# Supplementary material
Source: PubMed Central journal article supplement (PMC7083075)
Supplement: NIHMS1569521-supplement-5.pdf [file NIHMS1569521-supplement-5.pdf]

A

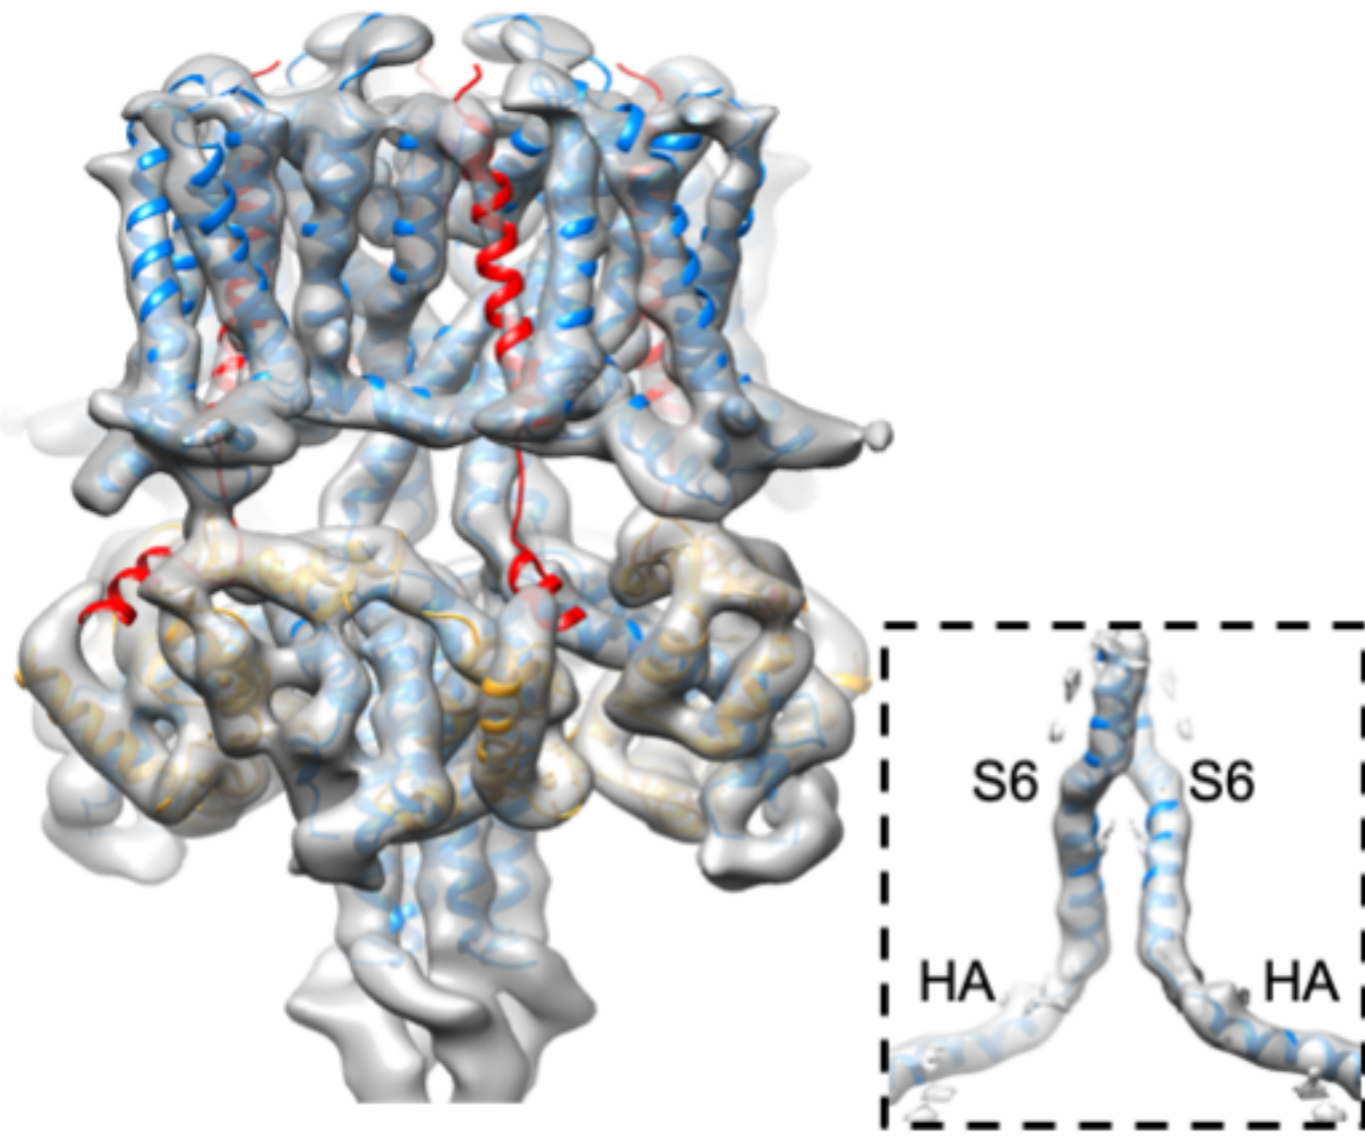

KCNQ1-KCNE3-CaM

B

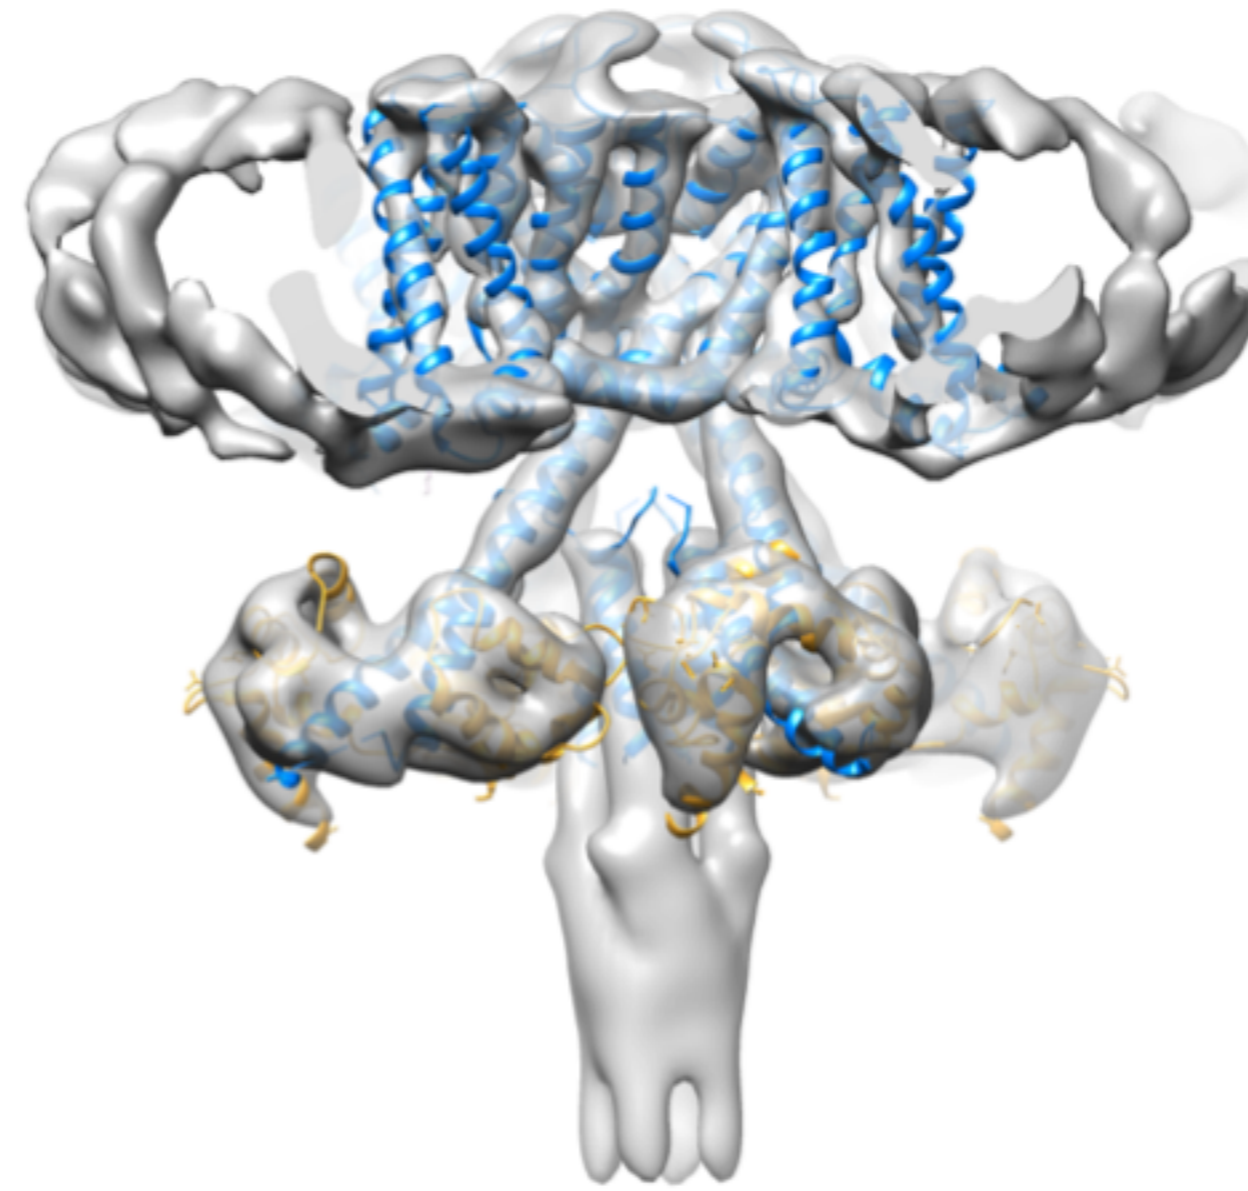

KCNQ1-CaM

C

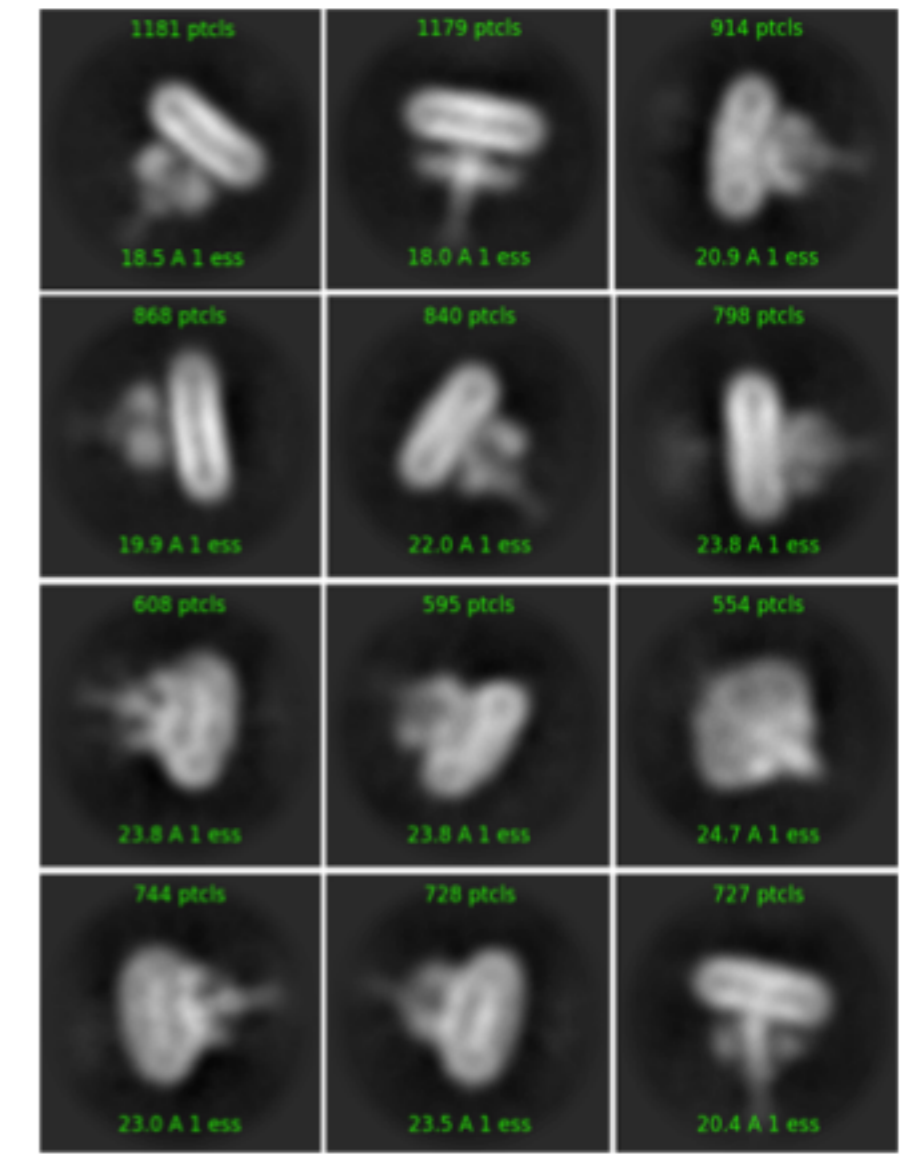

D

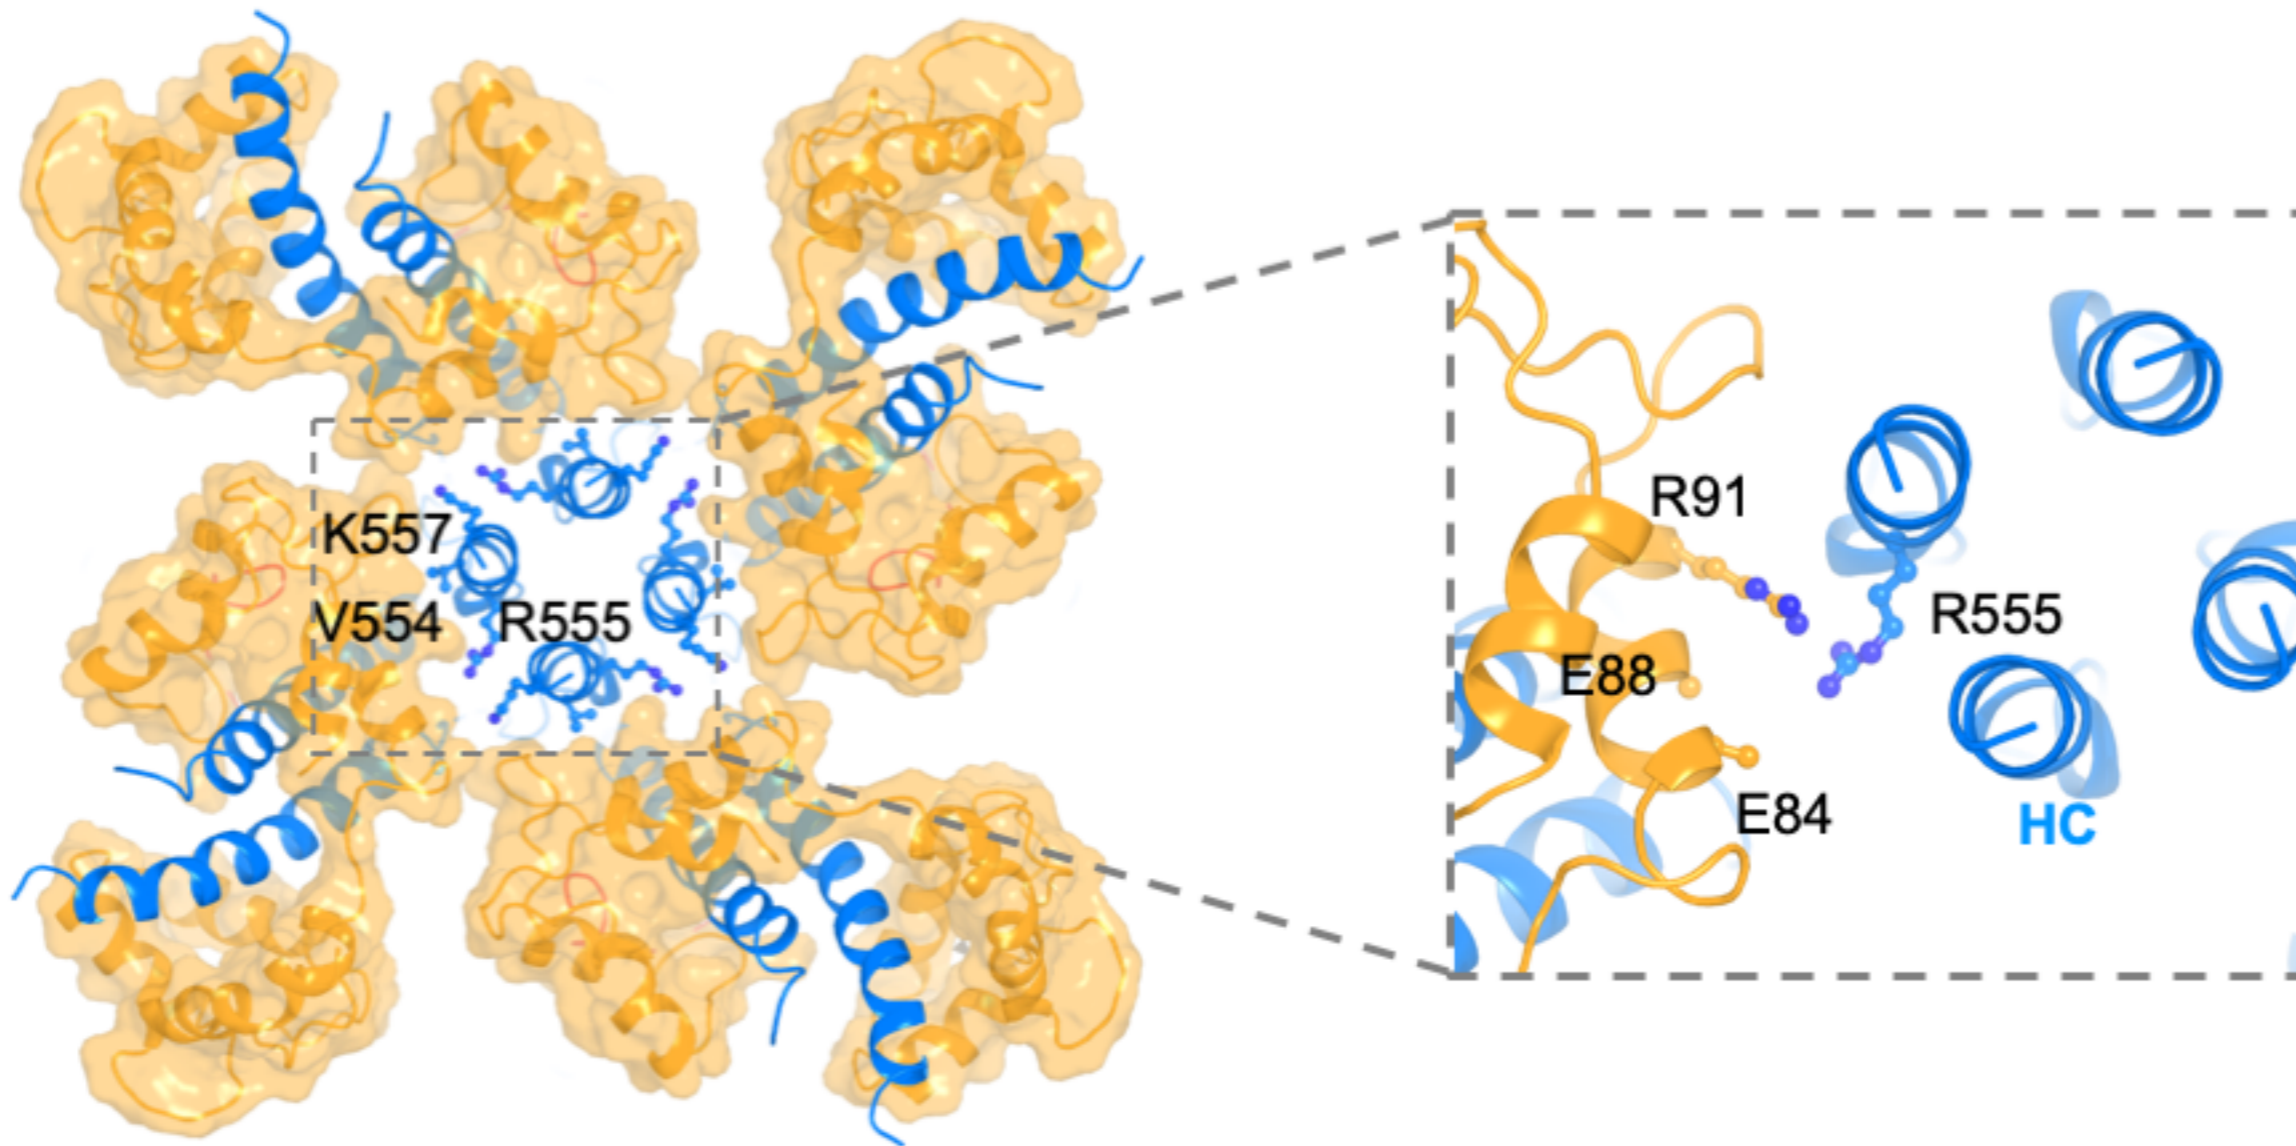

E

Sequence alignment around the RQKH motif

|          |            |    |
|----------|------------|----|
| Human Q1 | QQKQRQKHFN | RQ |
| Mouse Q1 | QQKQRQKHFN | RQ |
| Frog Q1  | QQKQRQKHFN | RQ |
| Human Q2 | QEQHRQKHFE | KR |
| Human Q3 | QEQHRQKHFE | KR |
| Human Q4 | QEQHRQKHFE | KR |
| Human Q5 | QEQHRQKHFE | KR |
