# Supplementary material
Source: PubMed Central journal article supplement (PMC7083075)
Supplement: NIHMS1569521-supplement-6.pdf [file NIHMS1569521-supplement-6.pdf]

Table S1. Summary of Cryo-EM Data Collection, 3D Reconstruction and Model Refinement. Related to Figure 1 and Figure 3.

|                                            | hKCNQ1 <sub>EM</sub> -CaM<br>(Digitonin) | hKCNQ1 <sub>EM</sub> -KCNE3-<br>CaM (Digitonin) | hKCNQ1 <sub>EM</sub> -KCNE3-<br>CaM (PIP2-nanodiscs) |
|--------------------------------------------|------------------------------------------|-------------------------------------------------|------------------------------------------------------|
| <b>Data acquisition</b>                    |                                          |                                                 |                                                      |
| Microscope/Camera                          | Titan Krios/Gatan K2 Summit (RU)         |                                                 | Krios2/K2 (NYSBC)                                    |
| Voltage (kV)                               |                                          | 300                                             |                                                      |
| Defocus range ( $\mu\text{M}$ )            | 1.1 to 2.4                               | 1.1 to 2.4                                      | 1.1 to 2.2                                           |
| Pixel size ( $\text{\AA}$ )                | 1.03                                     | 1.03                                            | 1.09                                                 |
| Total electron dose ( $e^-/\text{\AA}^2$ ) | 94                                       | 94                                              | 67.3                                                 |
| Exposure time (s)                          | 12.5                                     | 12.5                                            | 10.0                                                 |
| <b>Reconstruction</b>                      |                                          |                                                 |                                                      |
| Particle number                            | 66,746                                   | 39,074                                          | 73,640                                               |
| Resolution (masked, $\text{\AA}$ )         | 3.1                                      | 3.1                                             | 3.9                                                  |
| <b>RMS deviation</b>                       |                                          |                                                 |                                                      |
| Bond length ( $\text{\AA}$ )               | 0.009                                    | 0.007                                           | 0.005                                                |
| Bond angle ( $^\circ$ )                    | 0.884                                    | 0.903                                           | 0.848                                                |
| <b>Ramachandran plot</b>                   |                                          |                                                 |                                                      |
| Favored (%)                                | 98.16                                    | 95.70                                           | 95.63                                                |
| Allowed (%)                                | 1.84                                     | 4.30                                            | 4.37                                                 |
| Outliers (%)                               | 0.00                                     | 0.00                                            | 0.00                                                 |
| <b>MolProbity</b>                          |                                          |                                                 |                                                      |
| Clash score                                | 2.28                                     | 2.47                                            | 3.55                                                 |
| Rotamer outliers (%)                       | 0.24                                     | 0.00                                            | 1.47                                                 |
