# Supplementary material
Source: PubMed Central journal article supplement (PMC7083075)

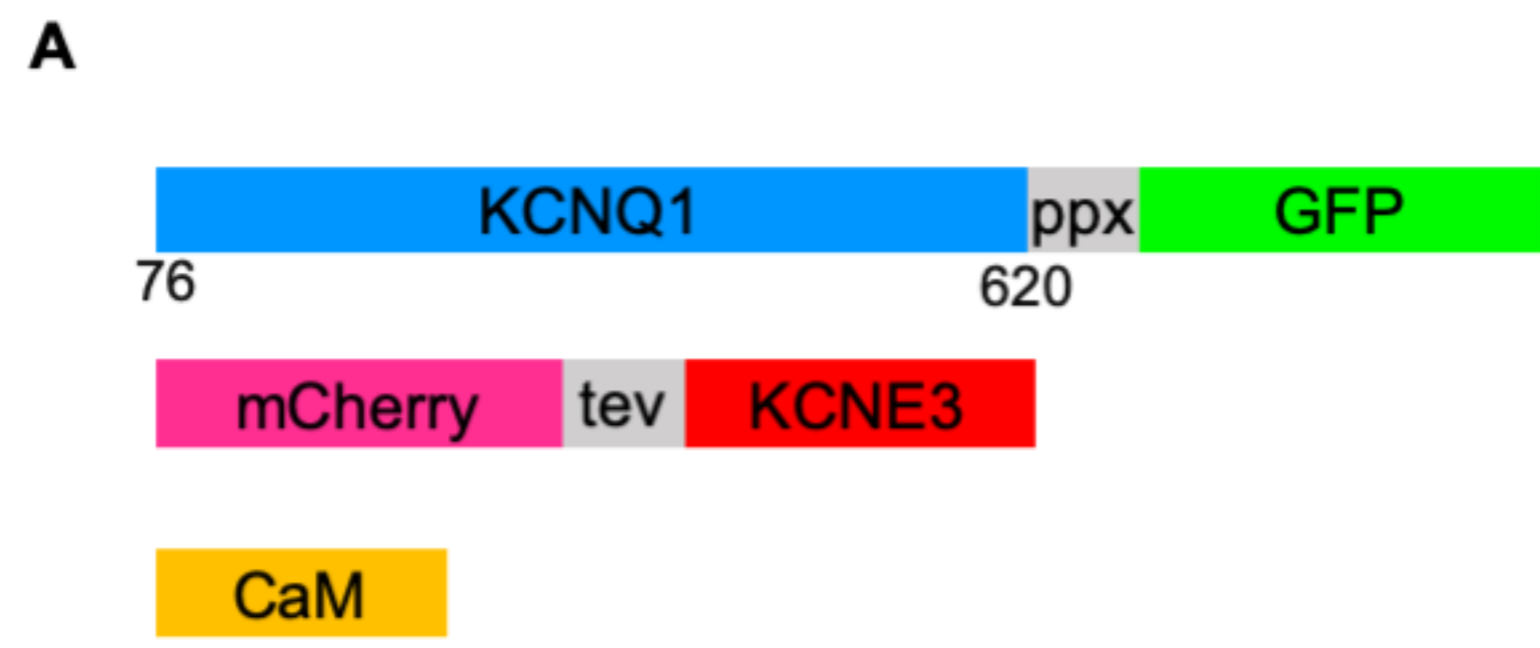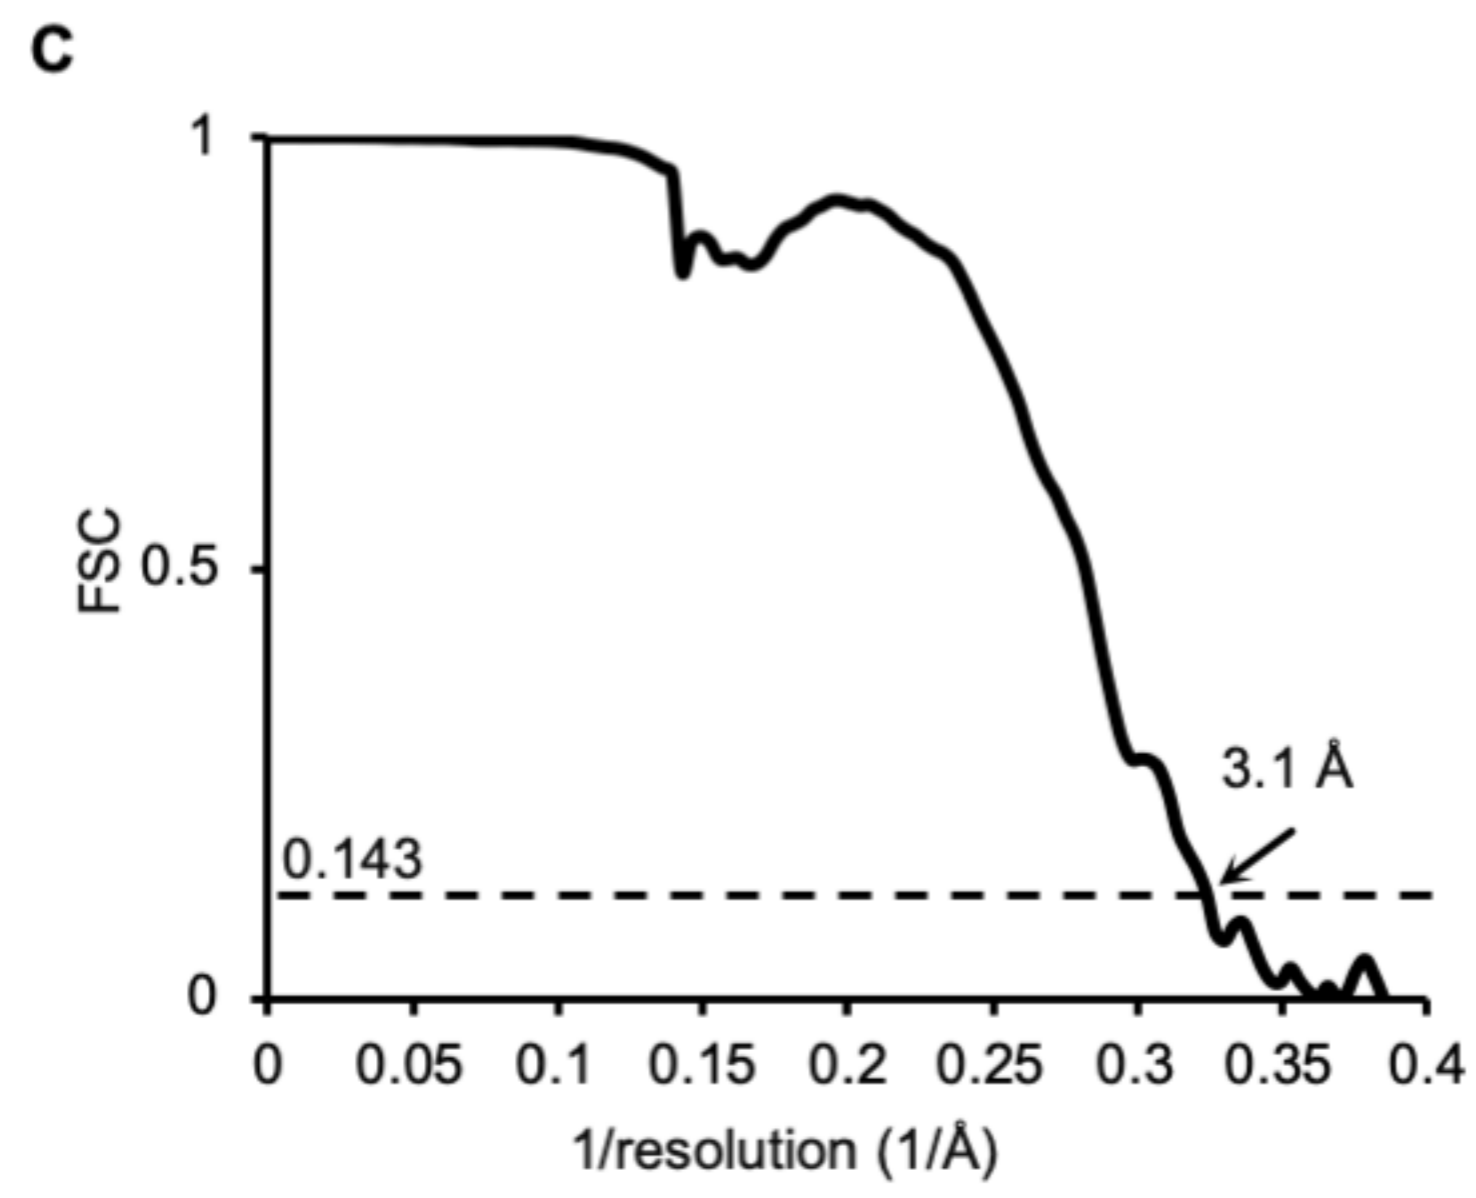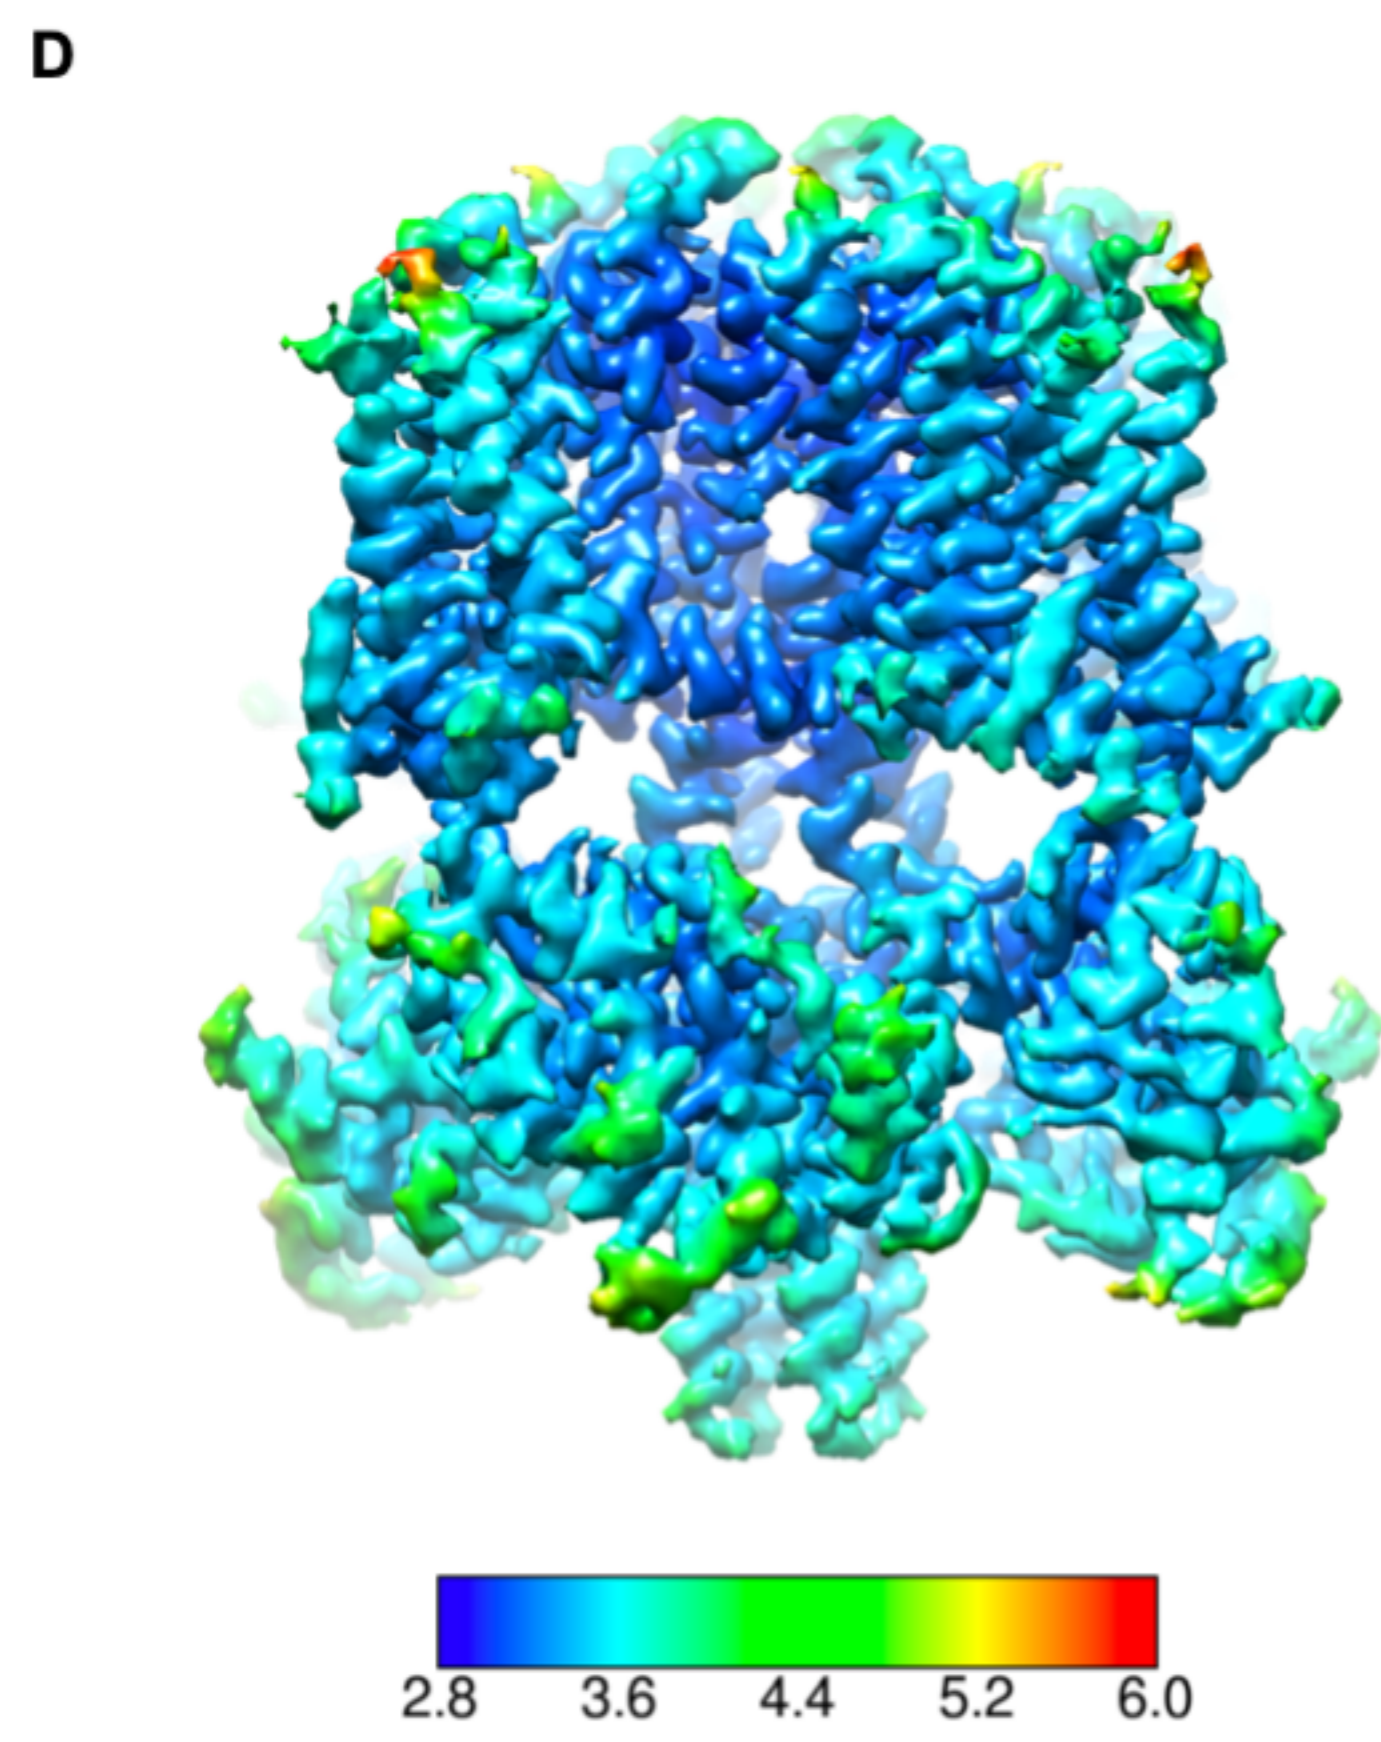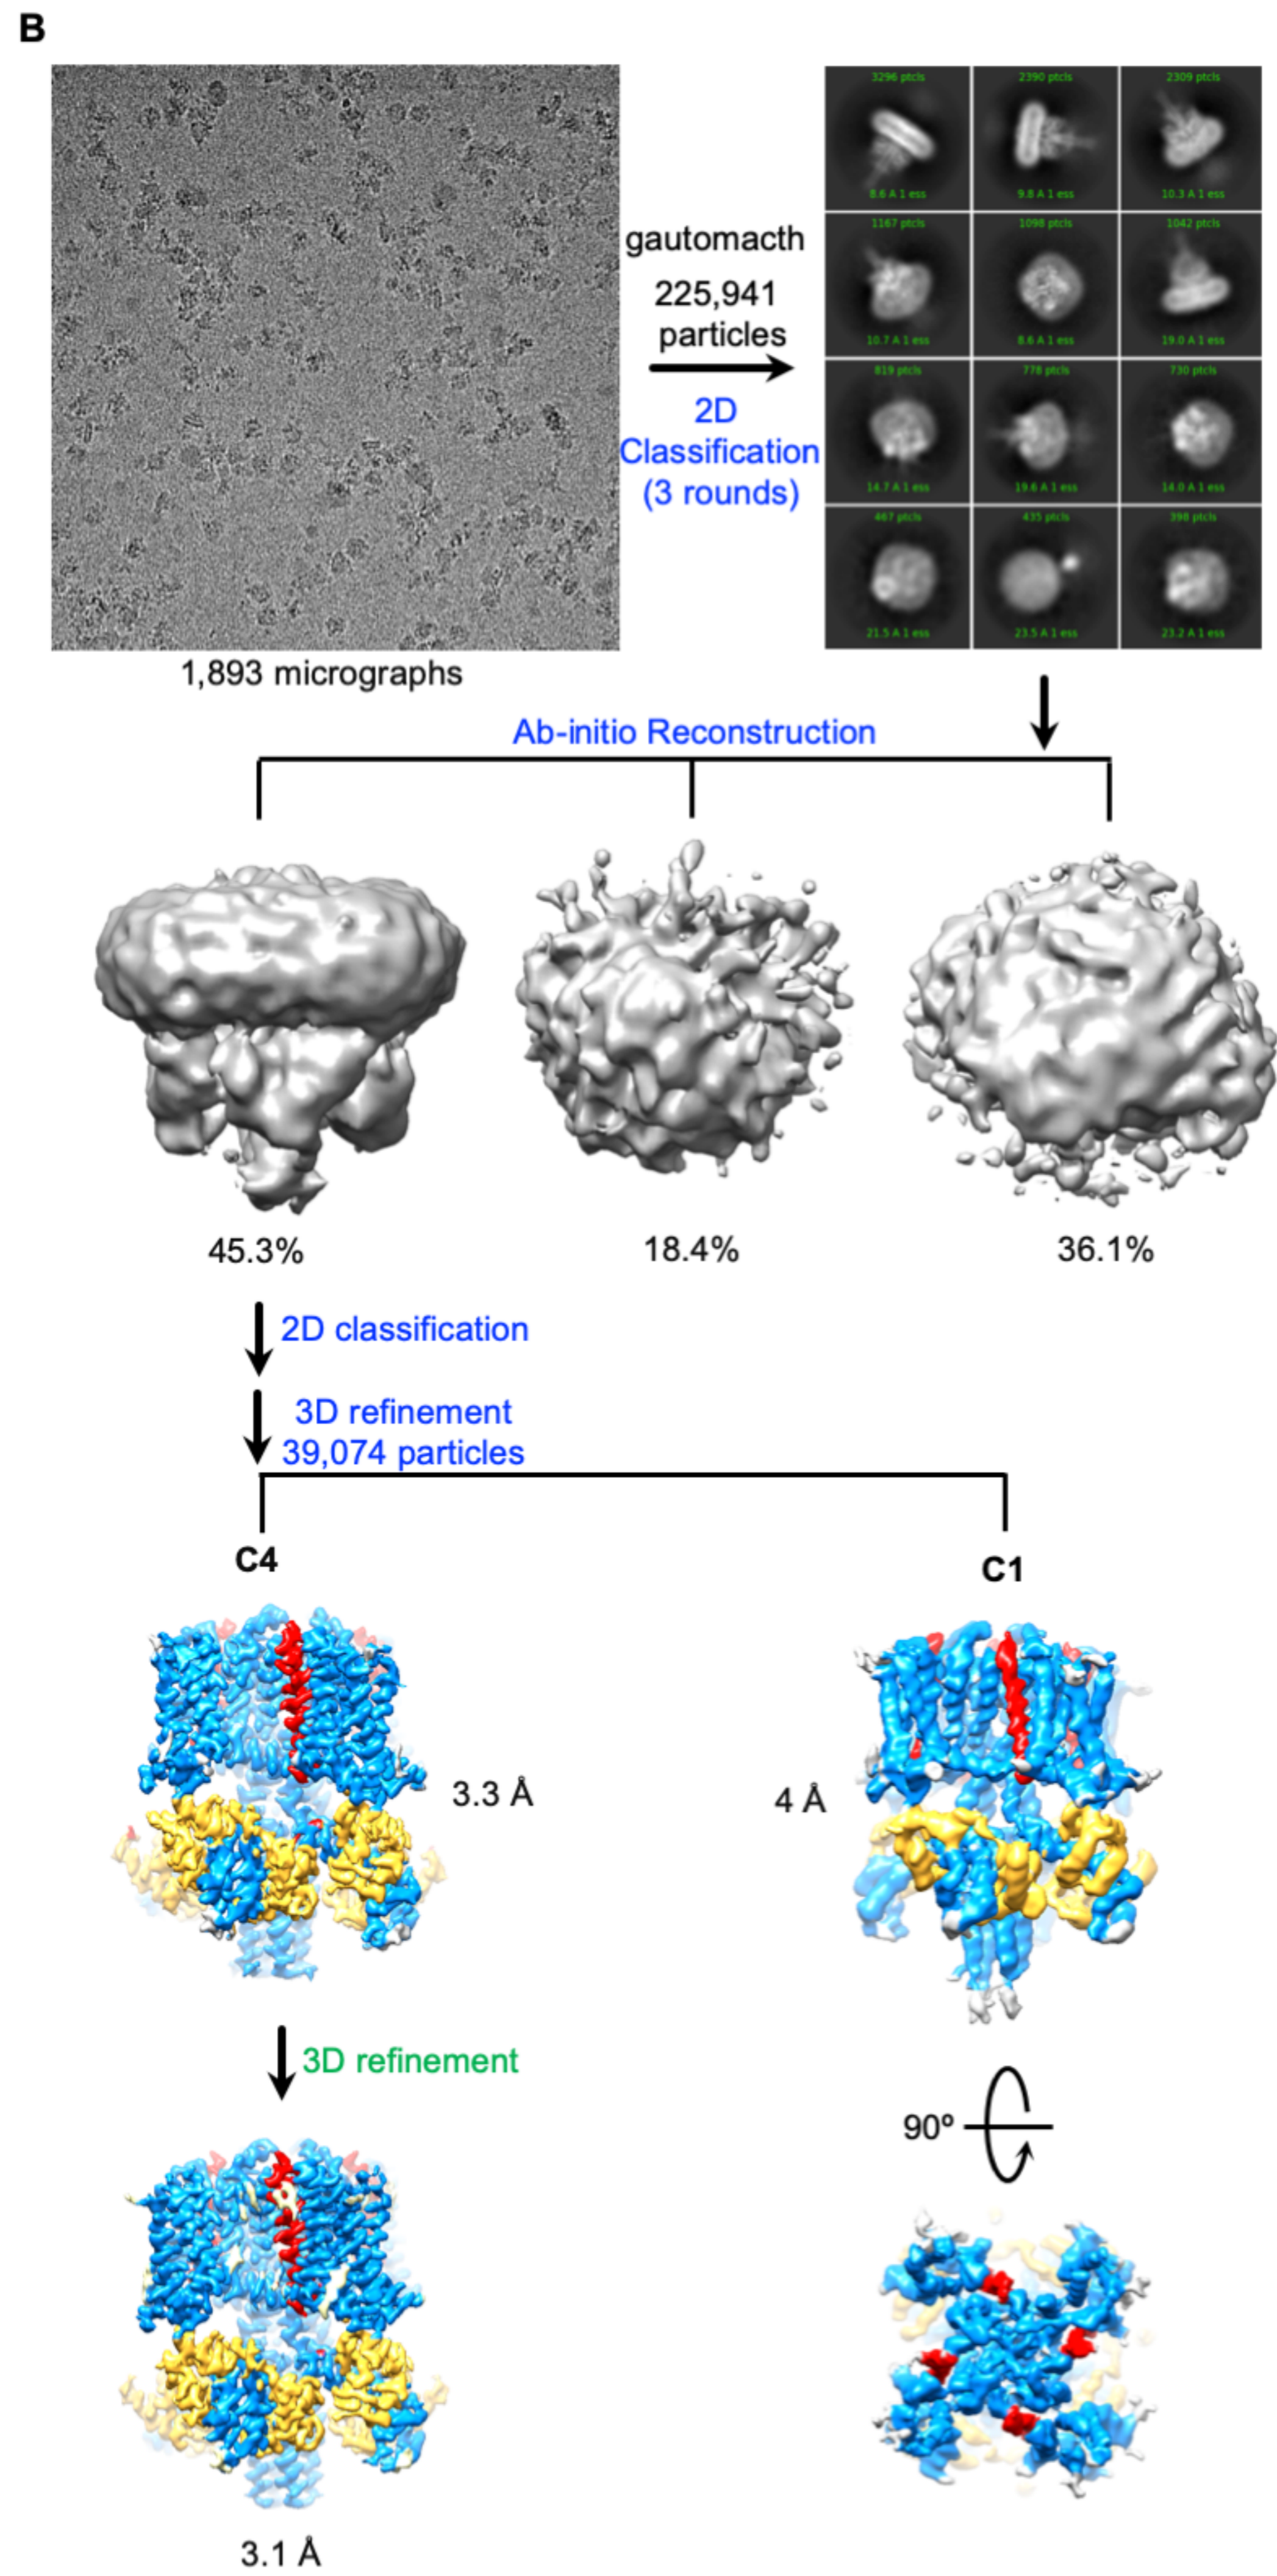

Supplement: NIHMS1569521-supplement-1.pdf [file NIHMS1569521-supplement-1.pdf]

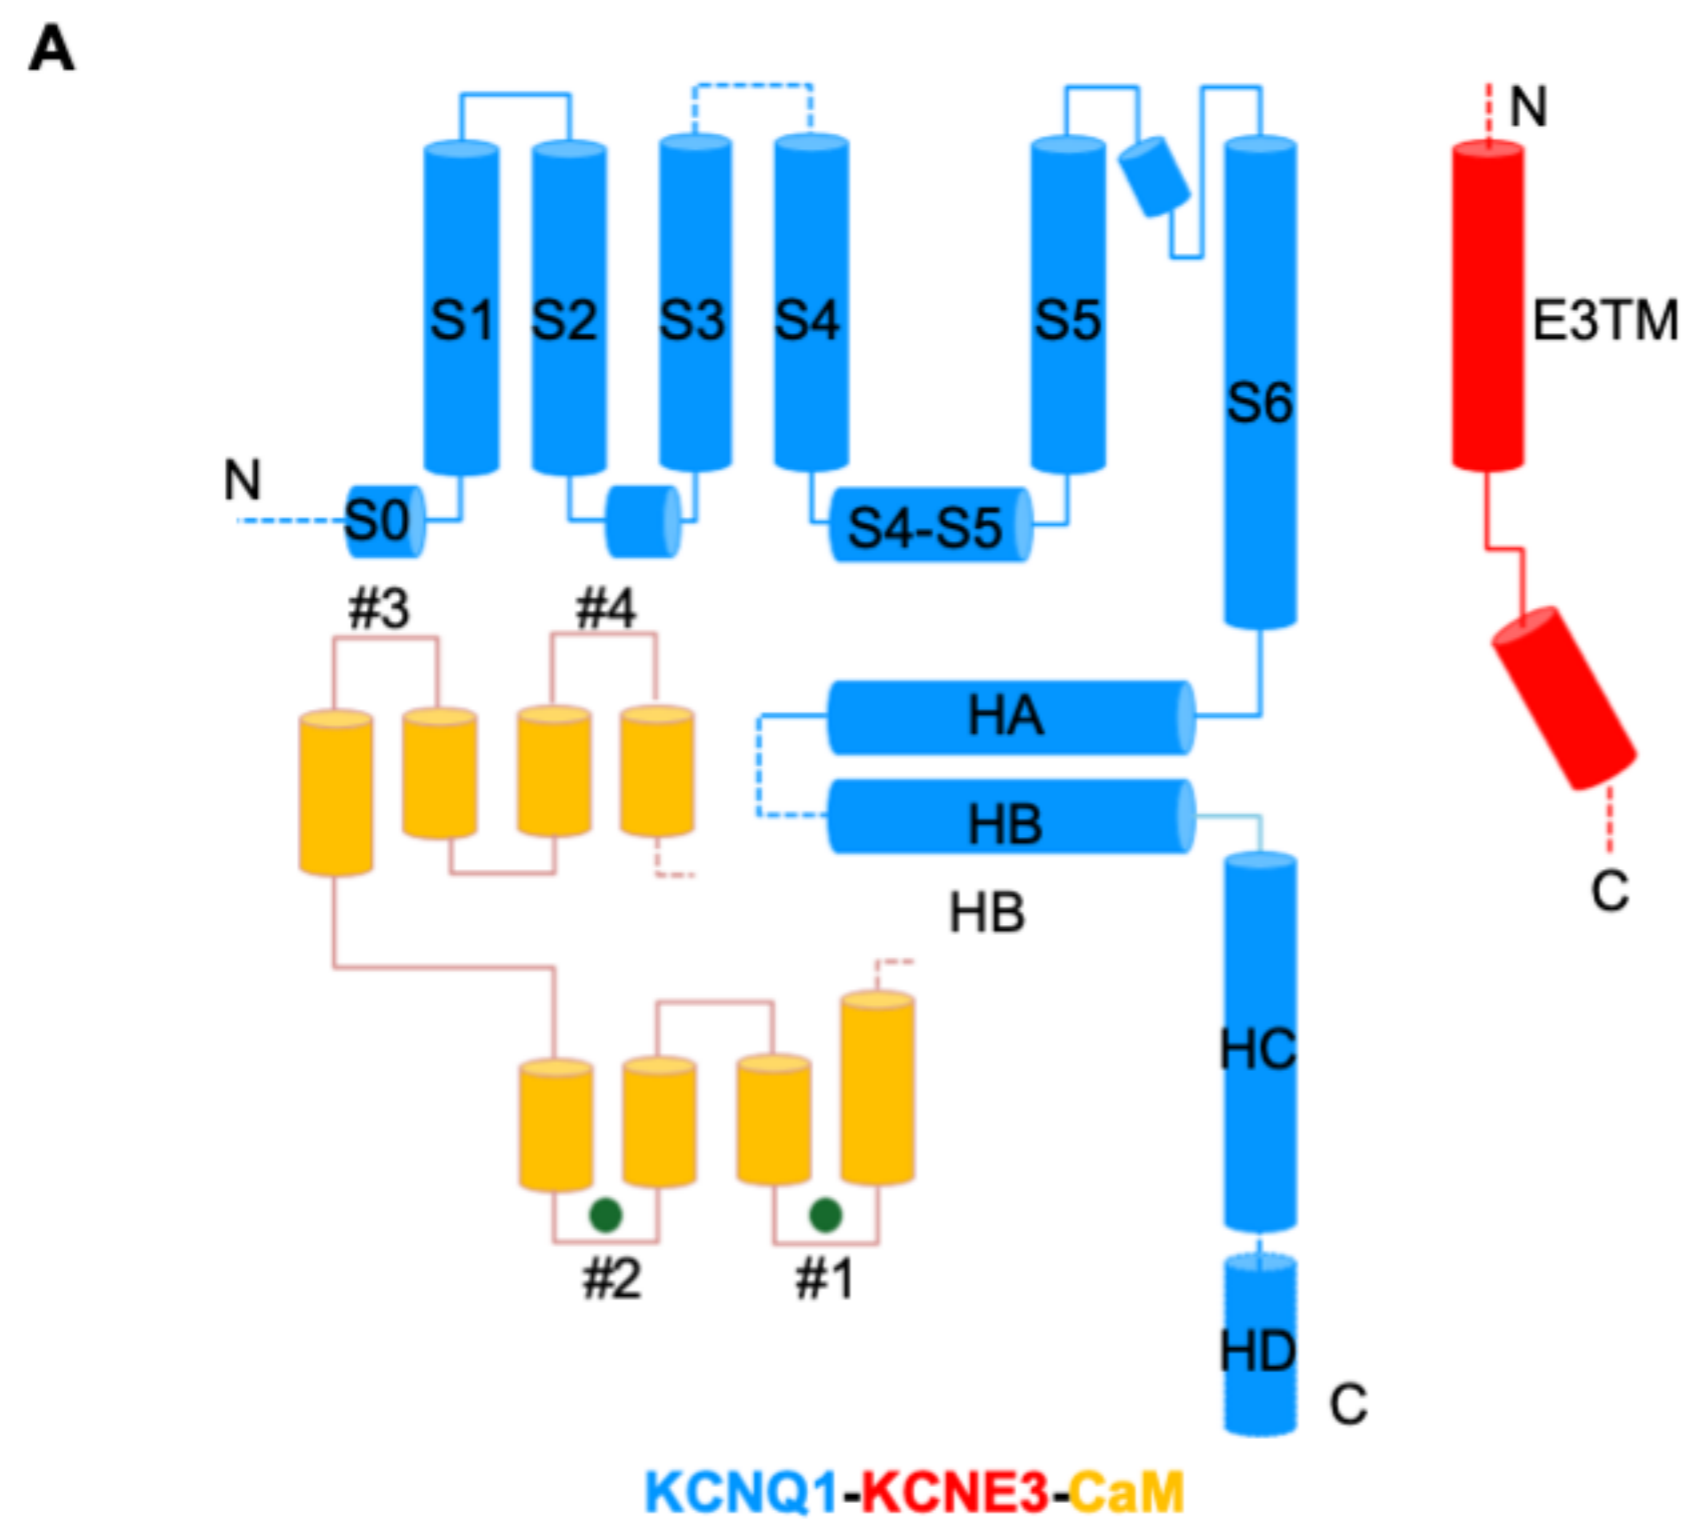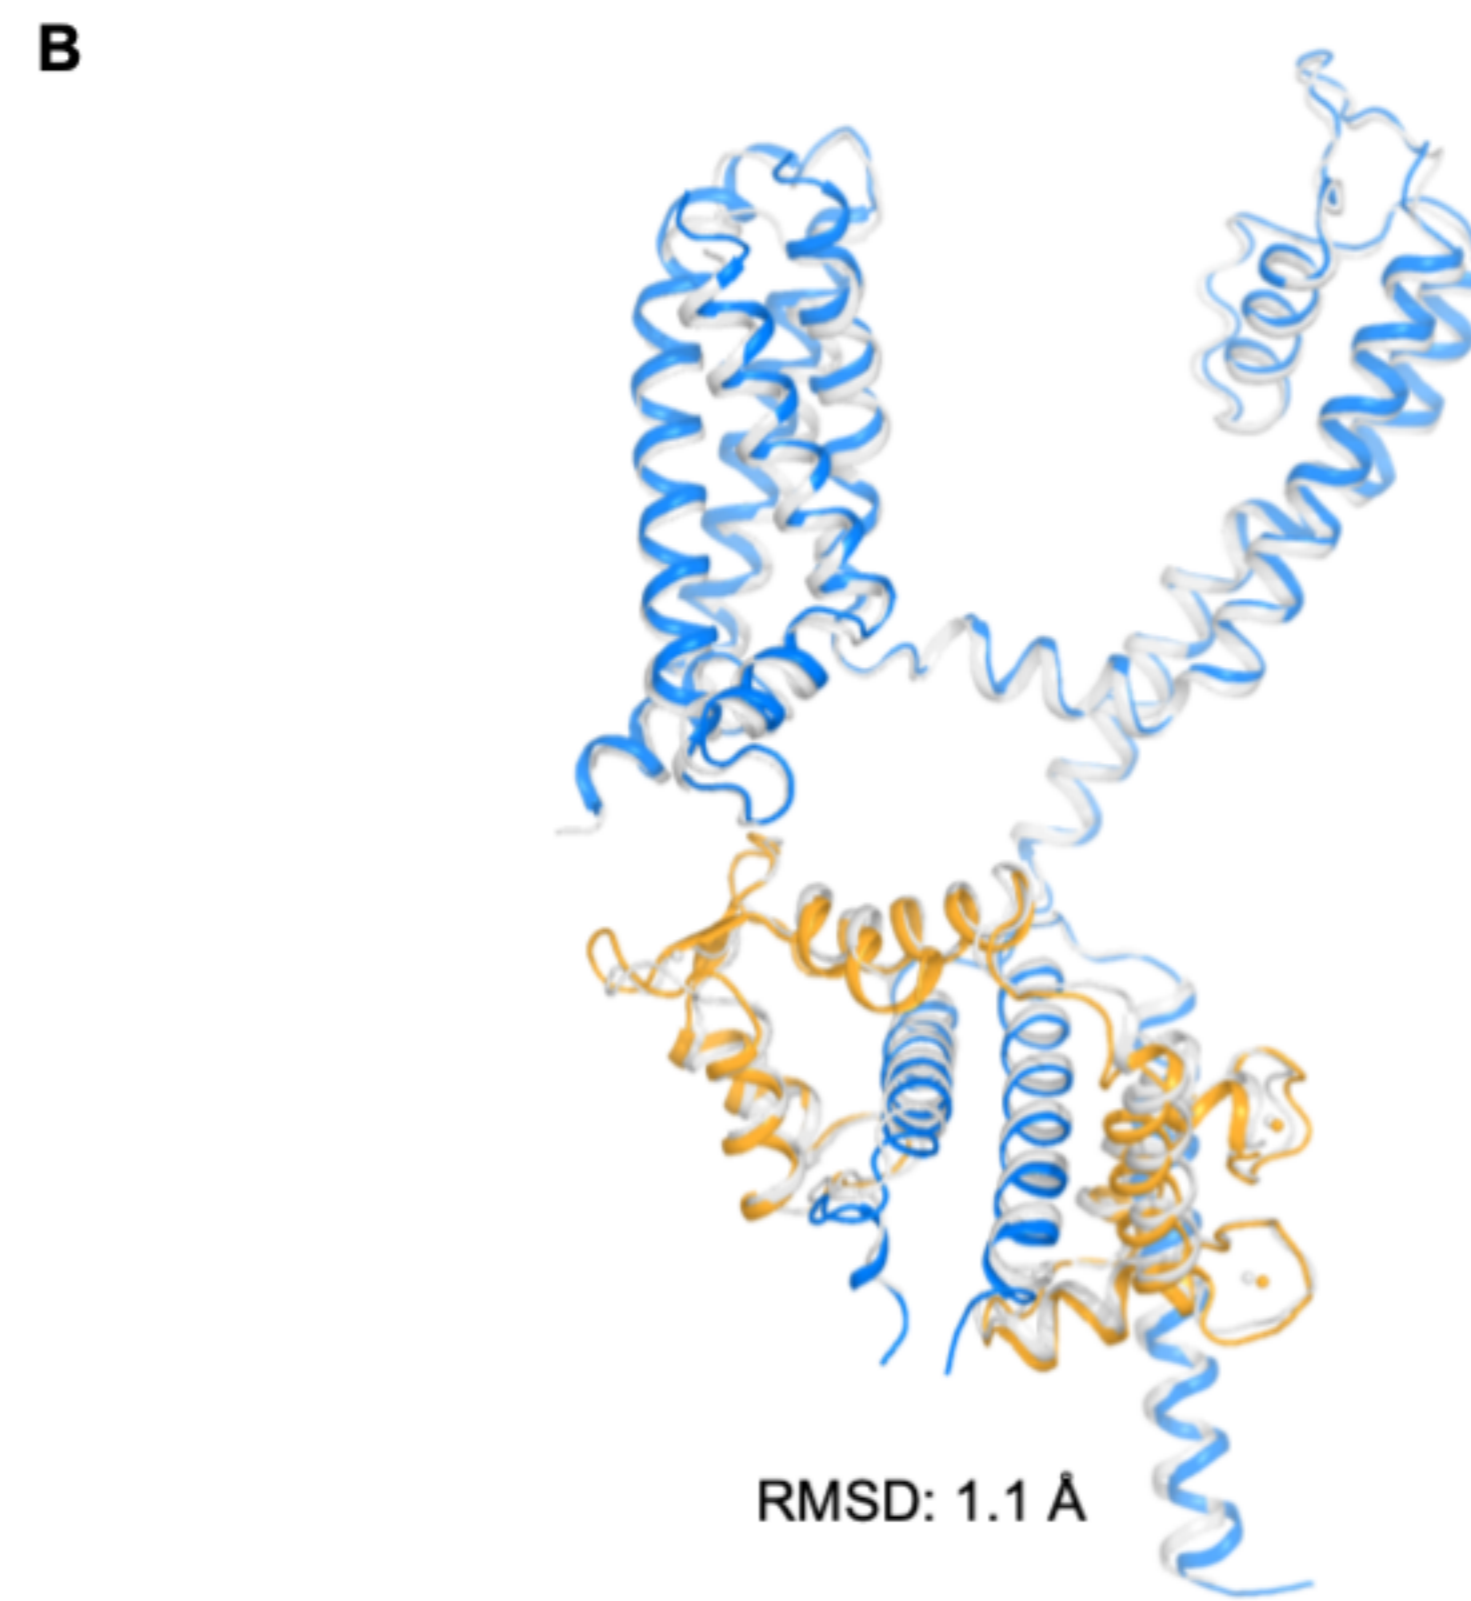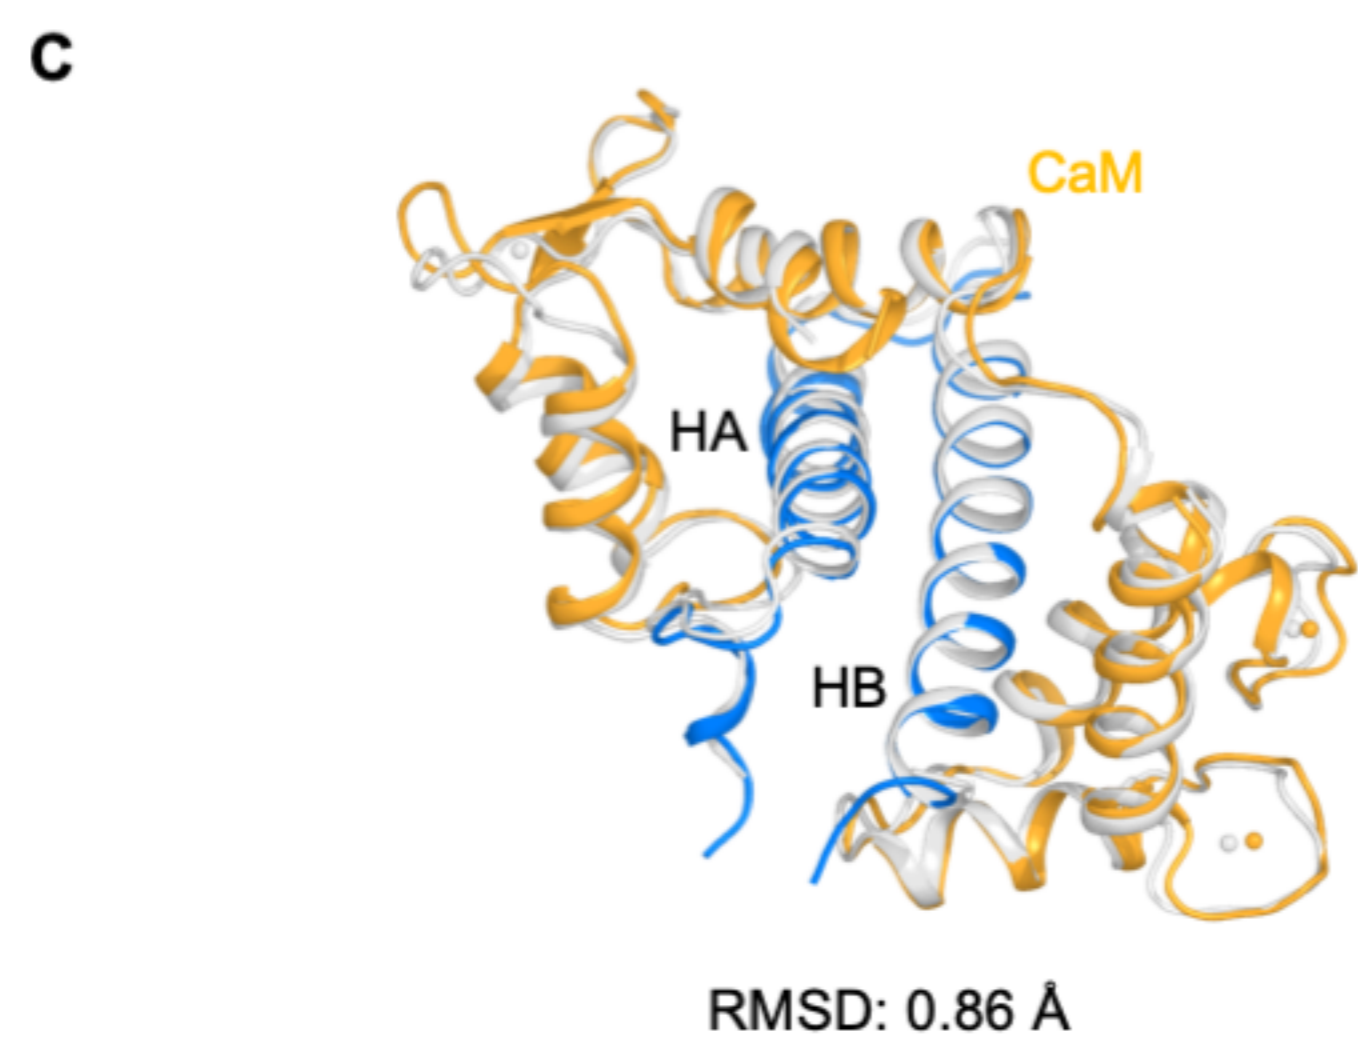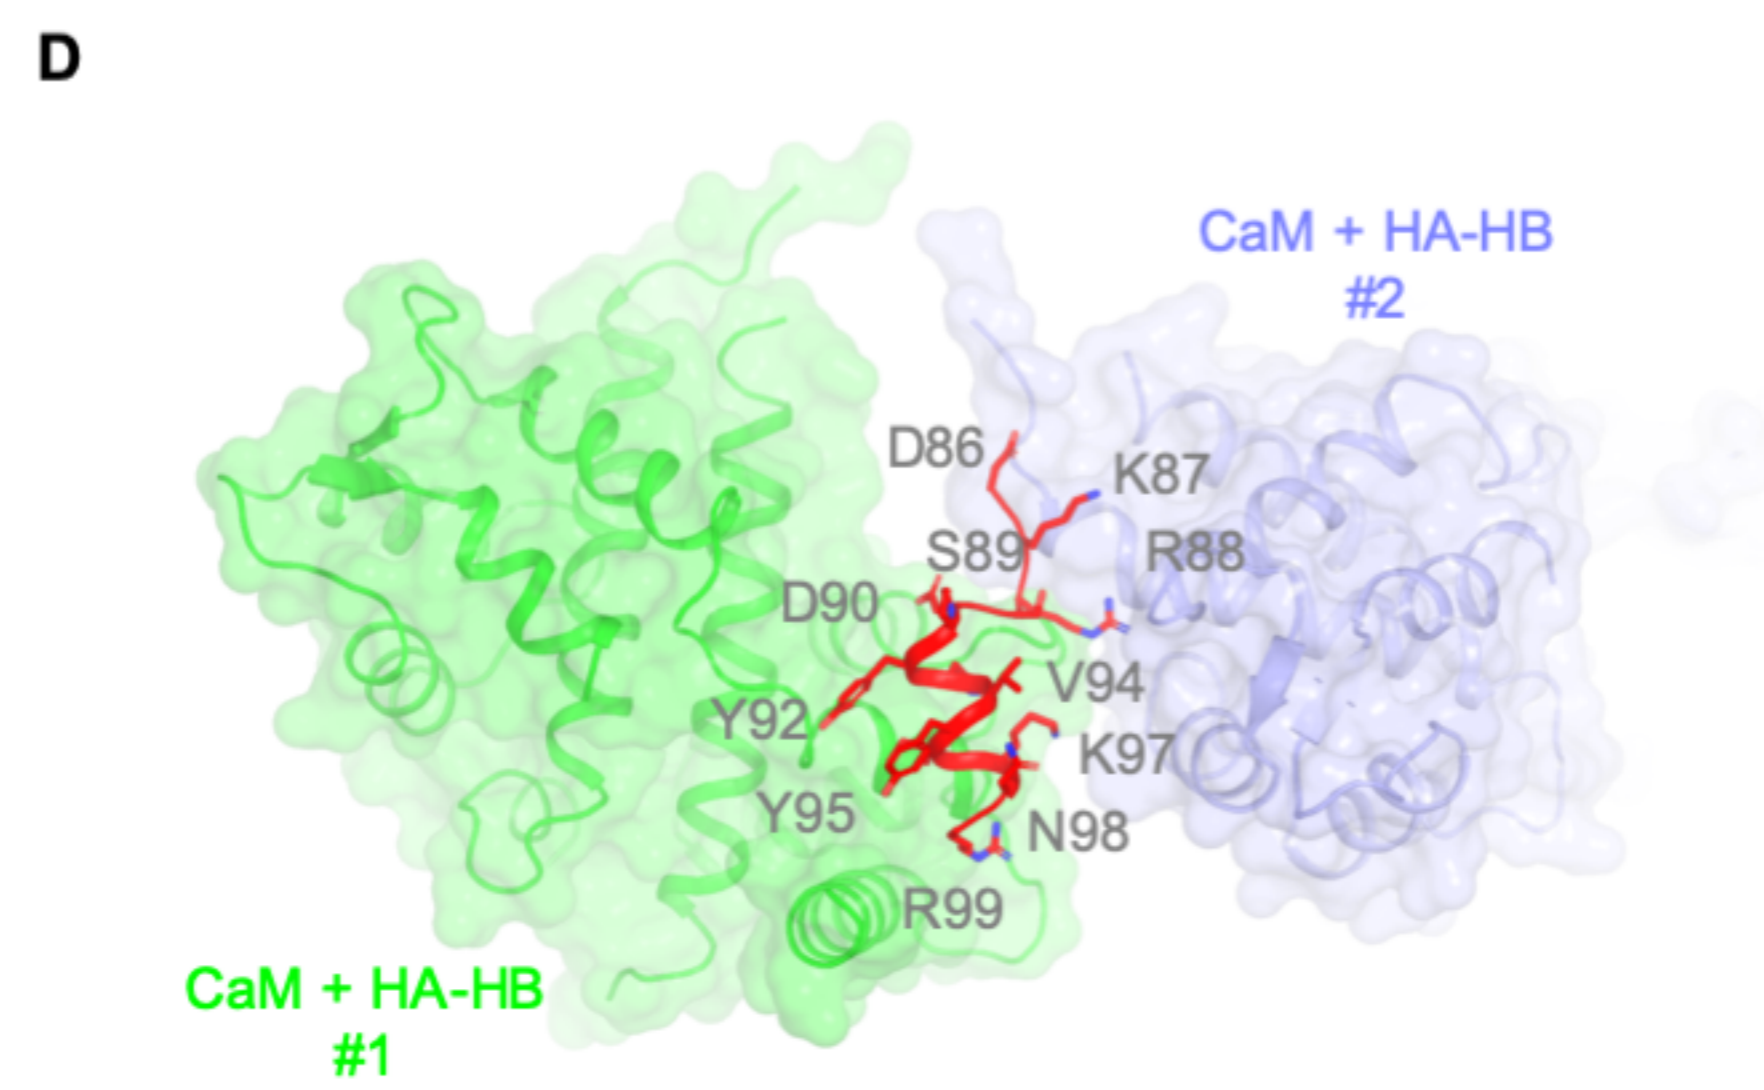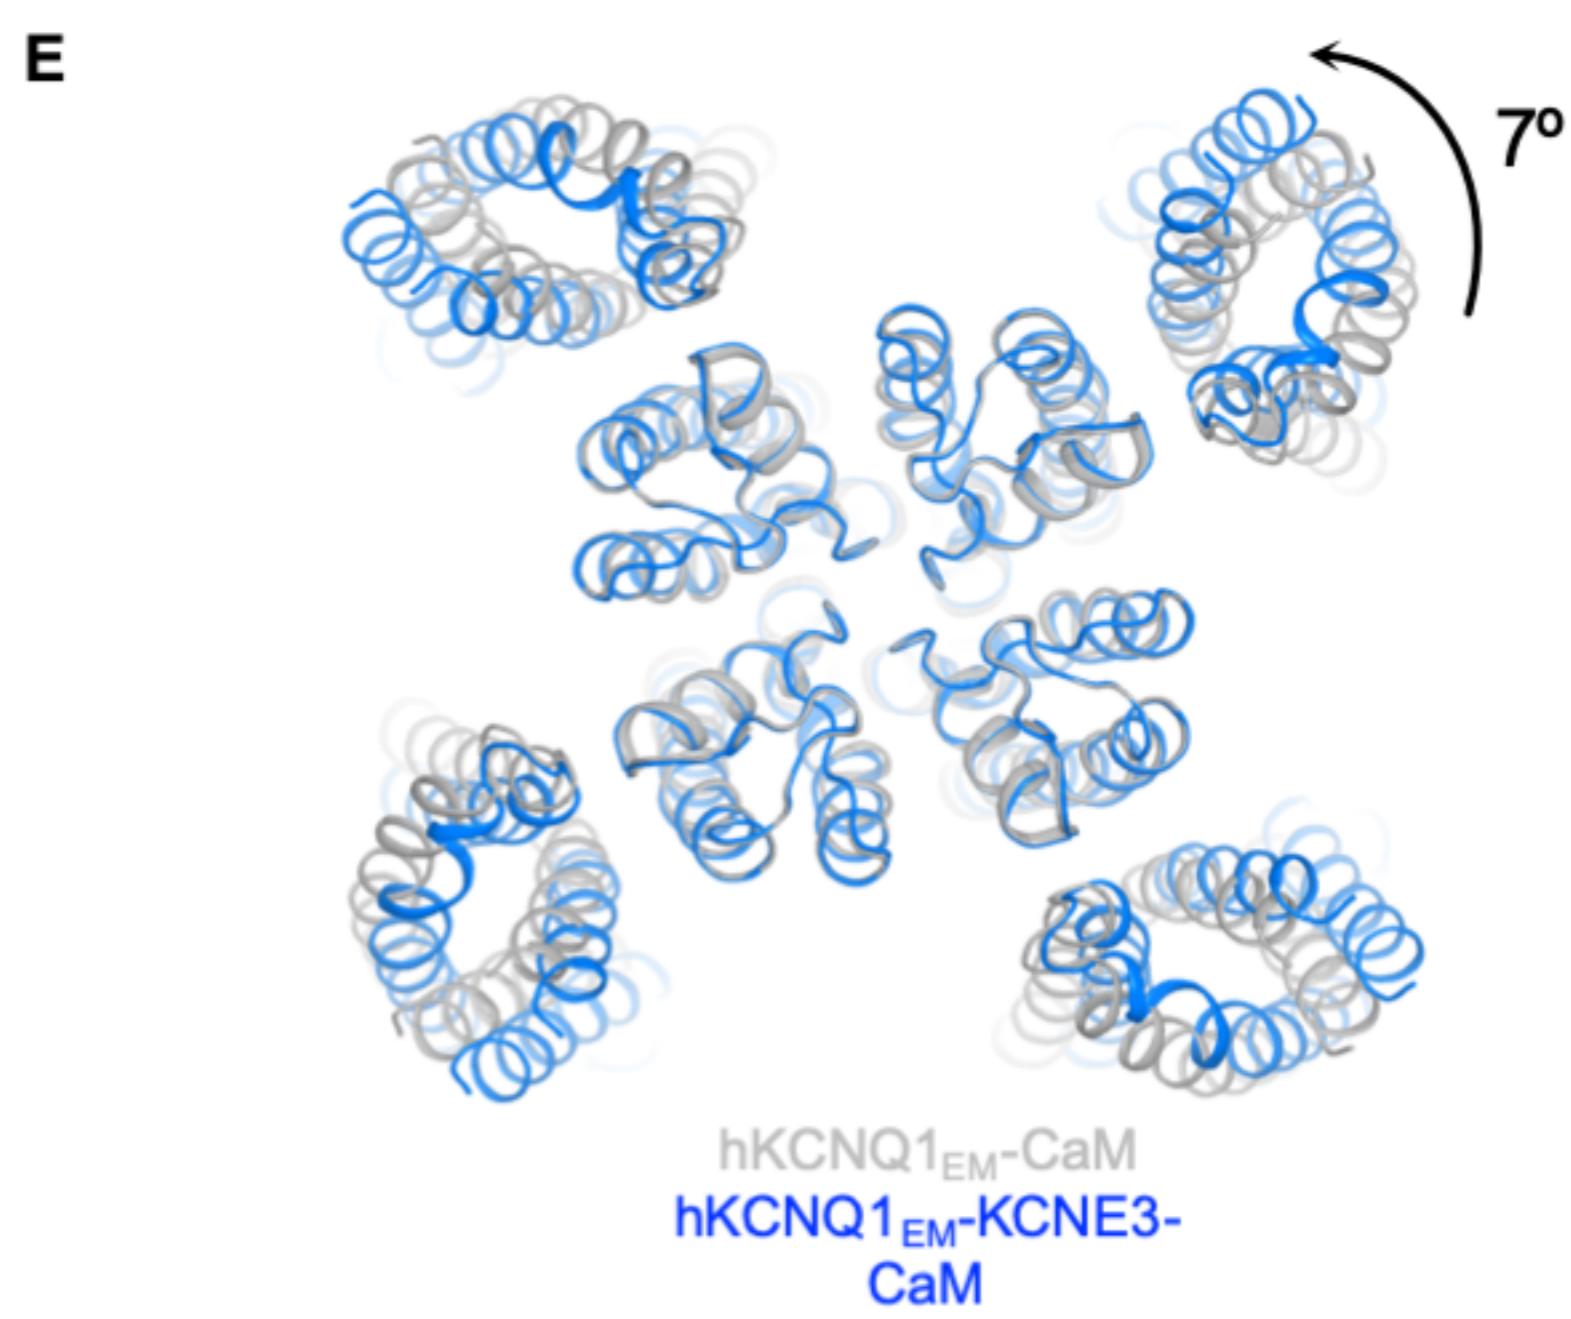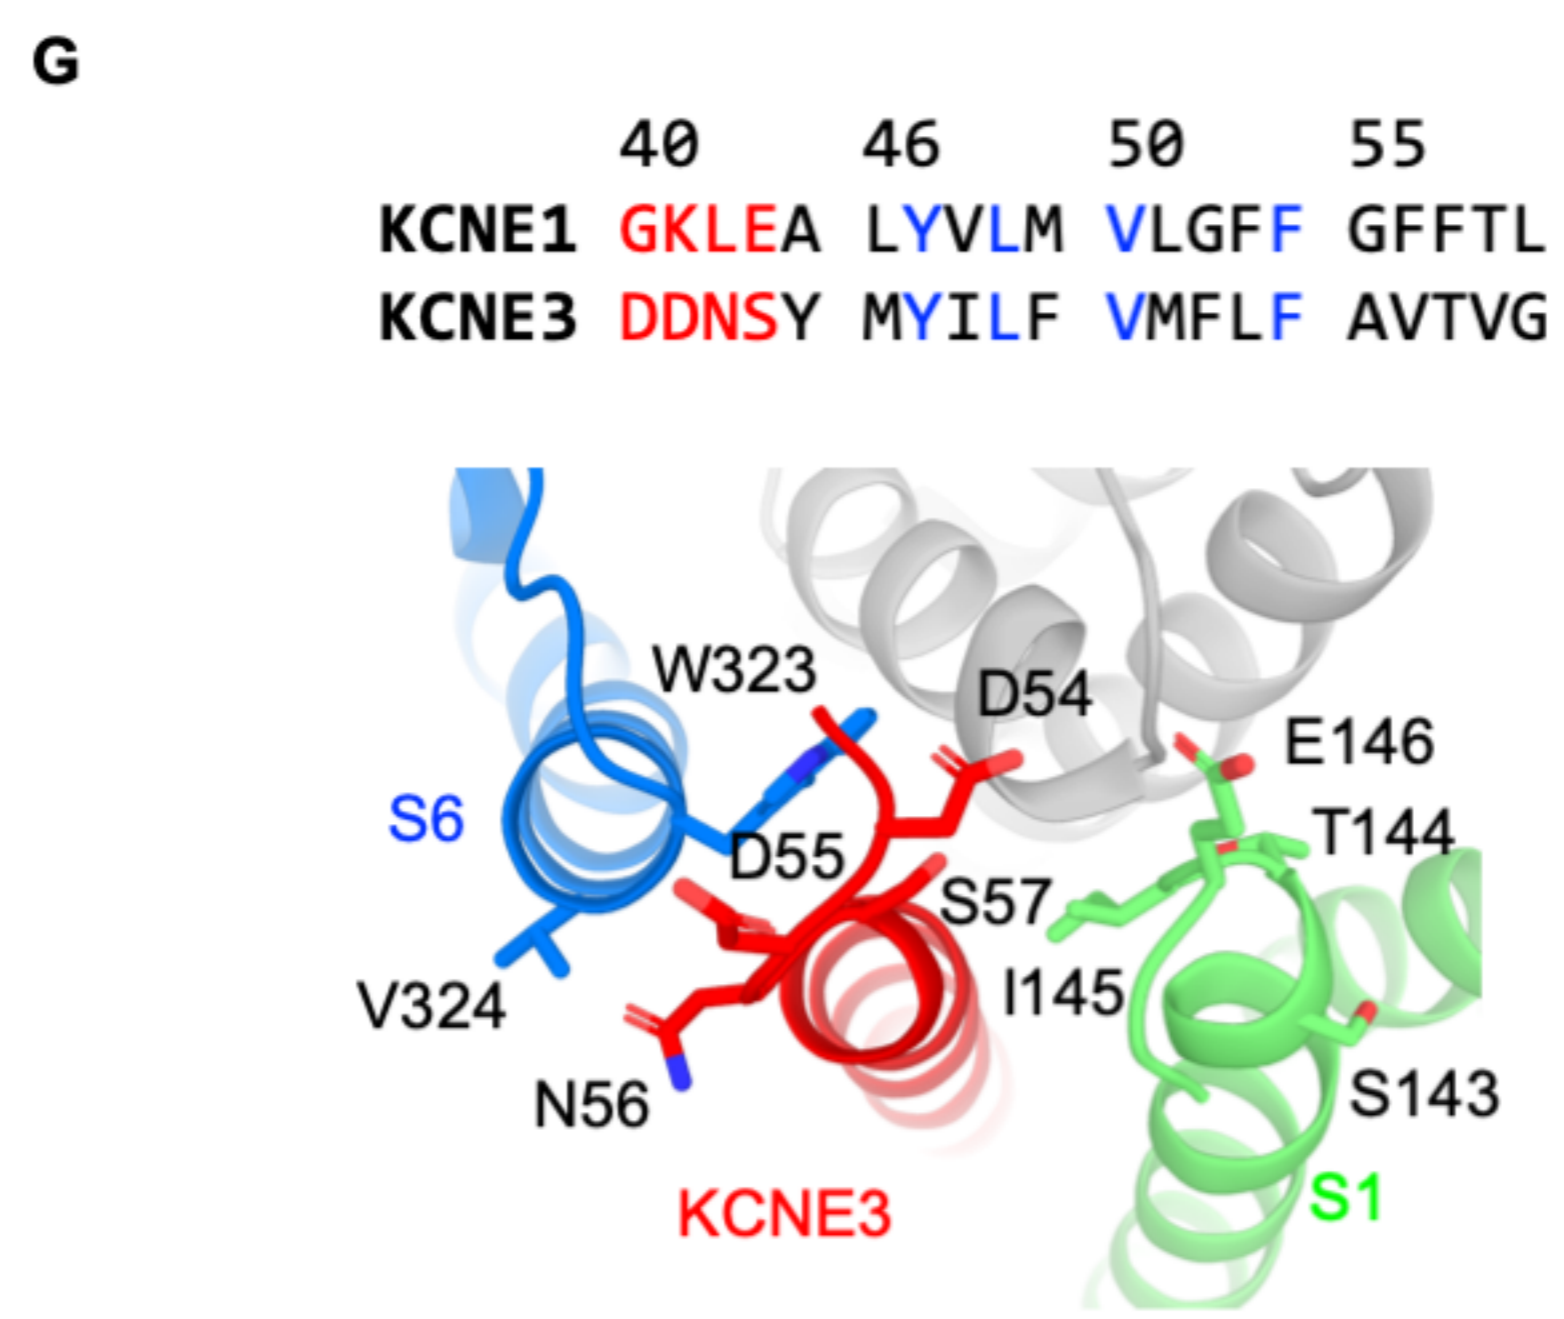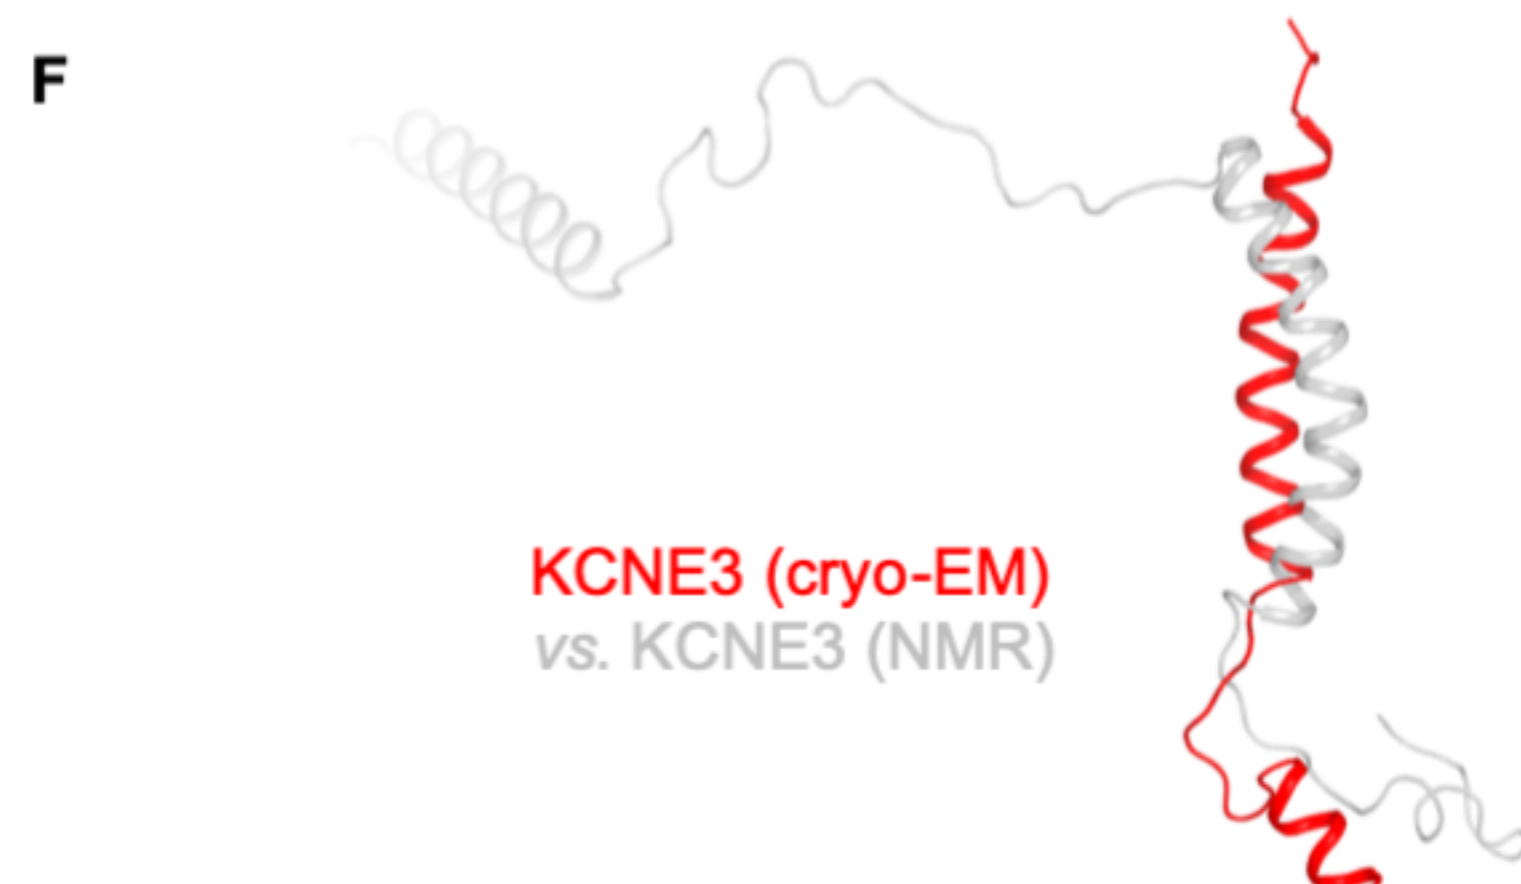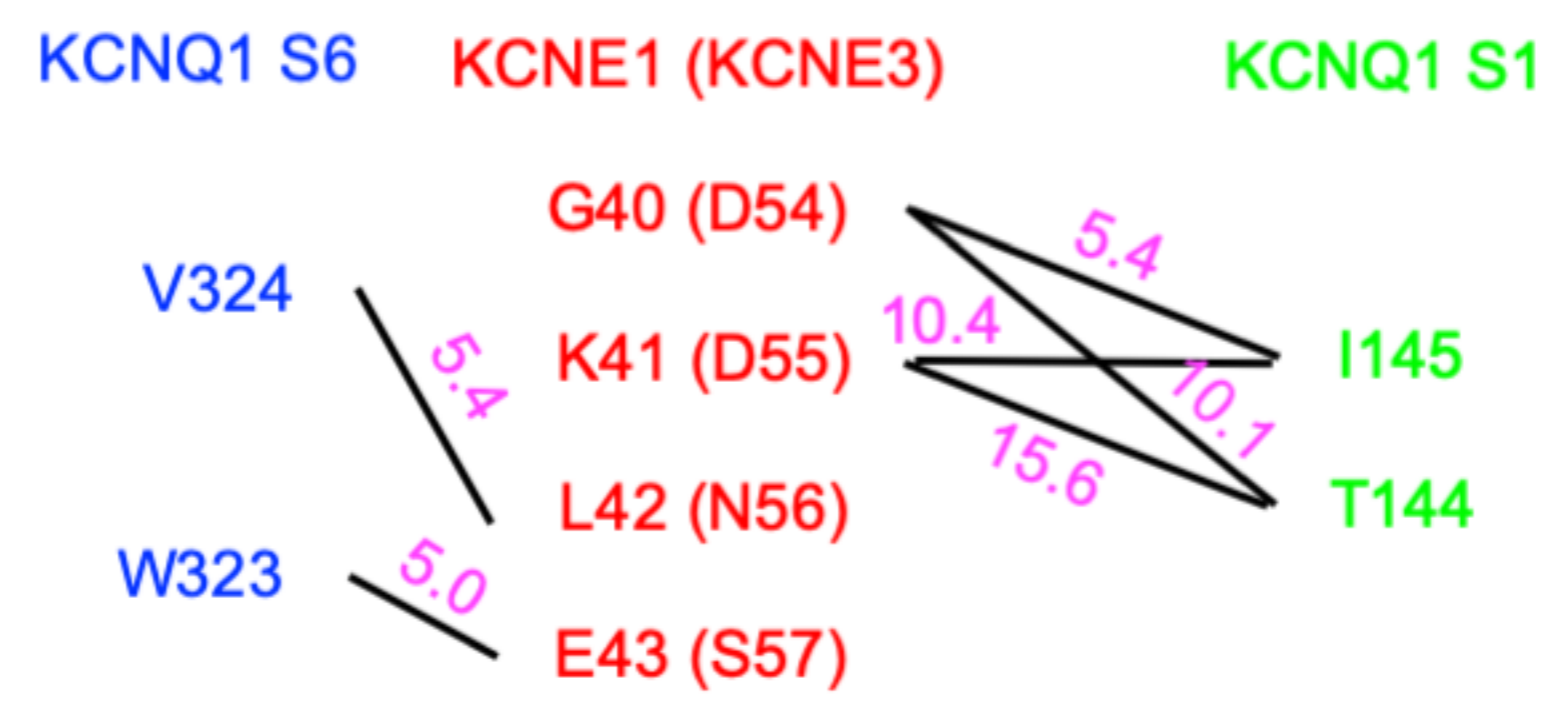

Supplement: NIHMS1569521-supplement-2.pdf [file NIHMS1569521-supplement-2.pdf]

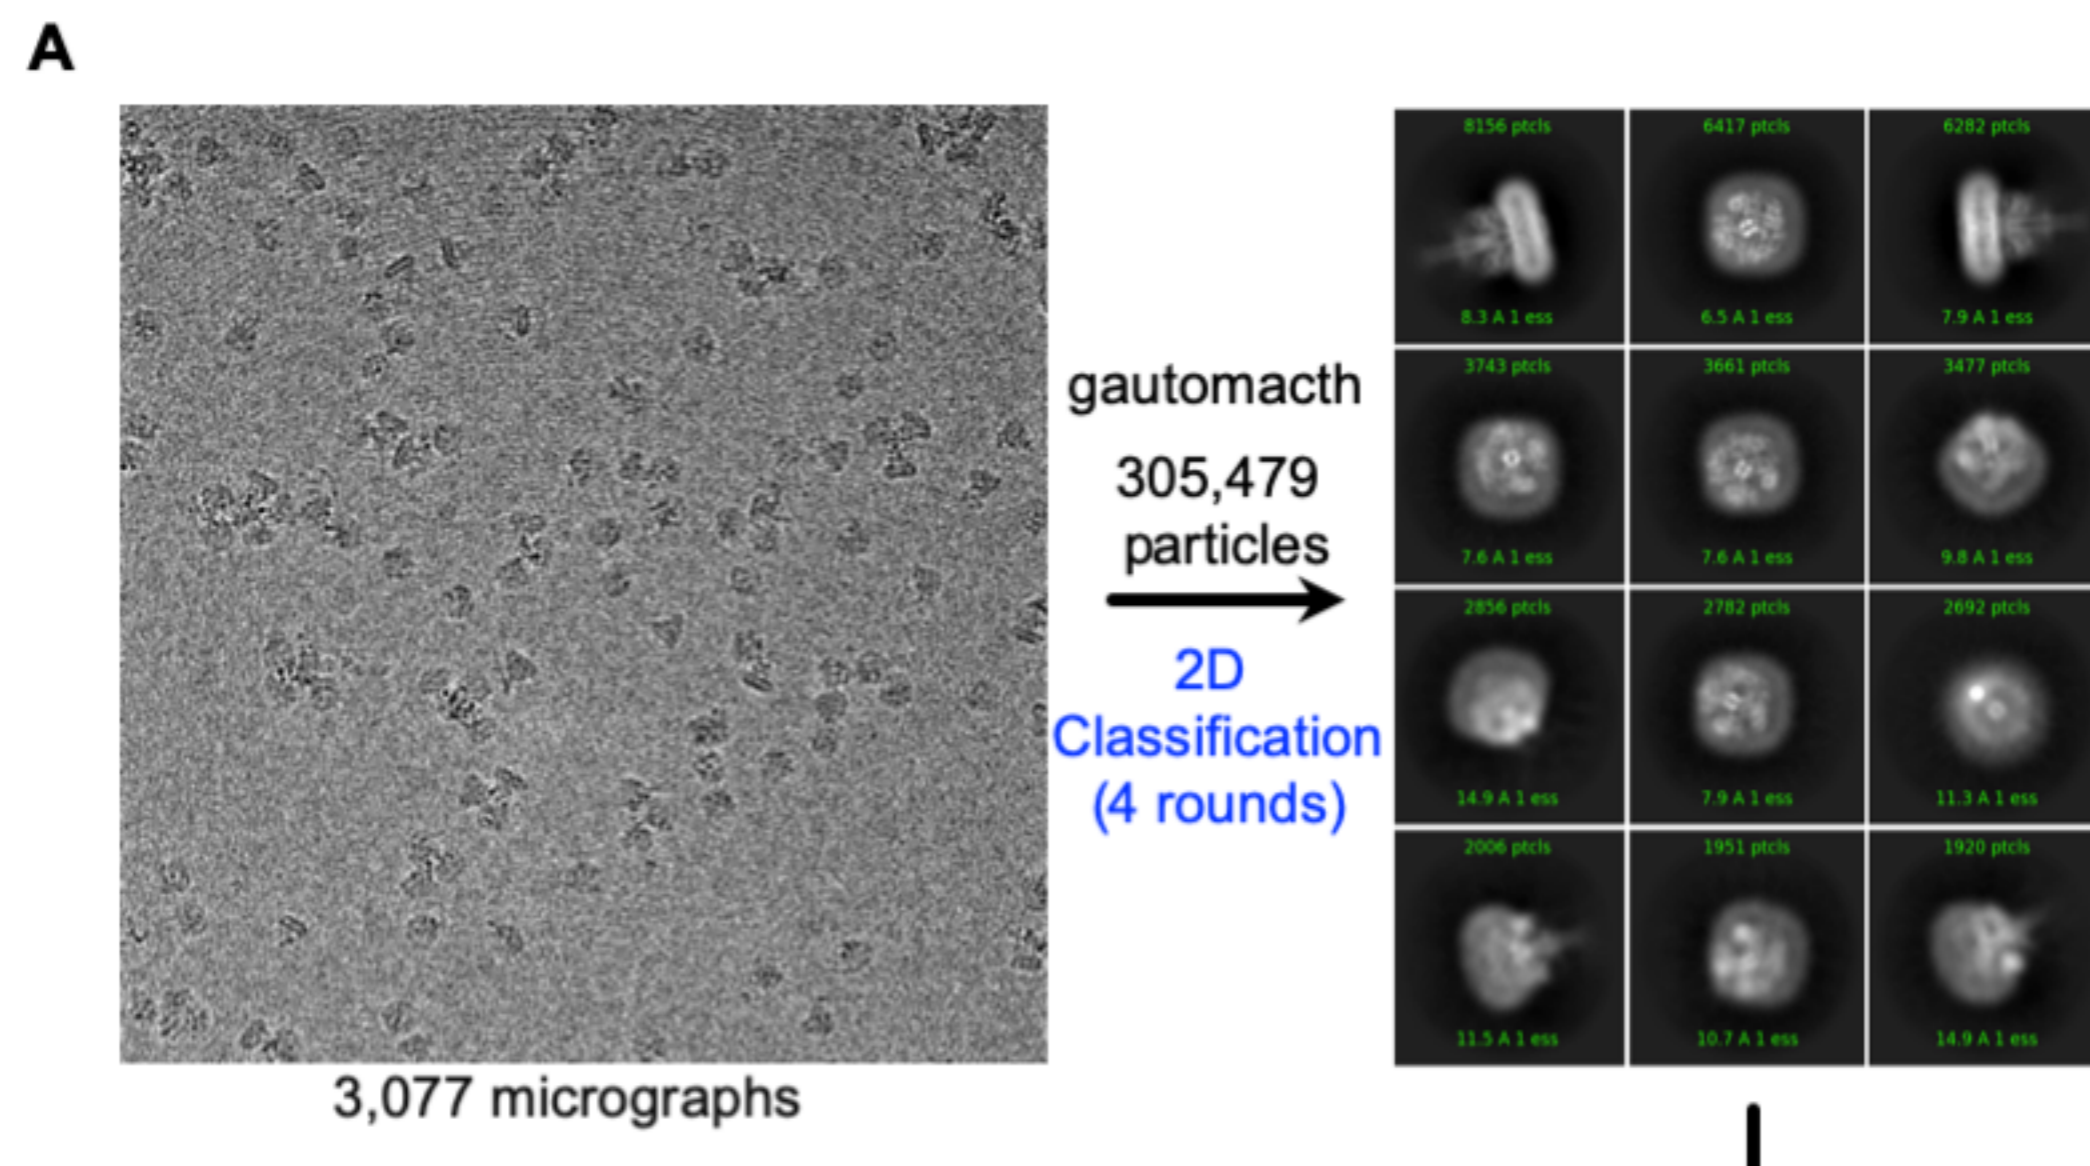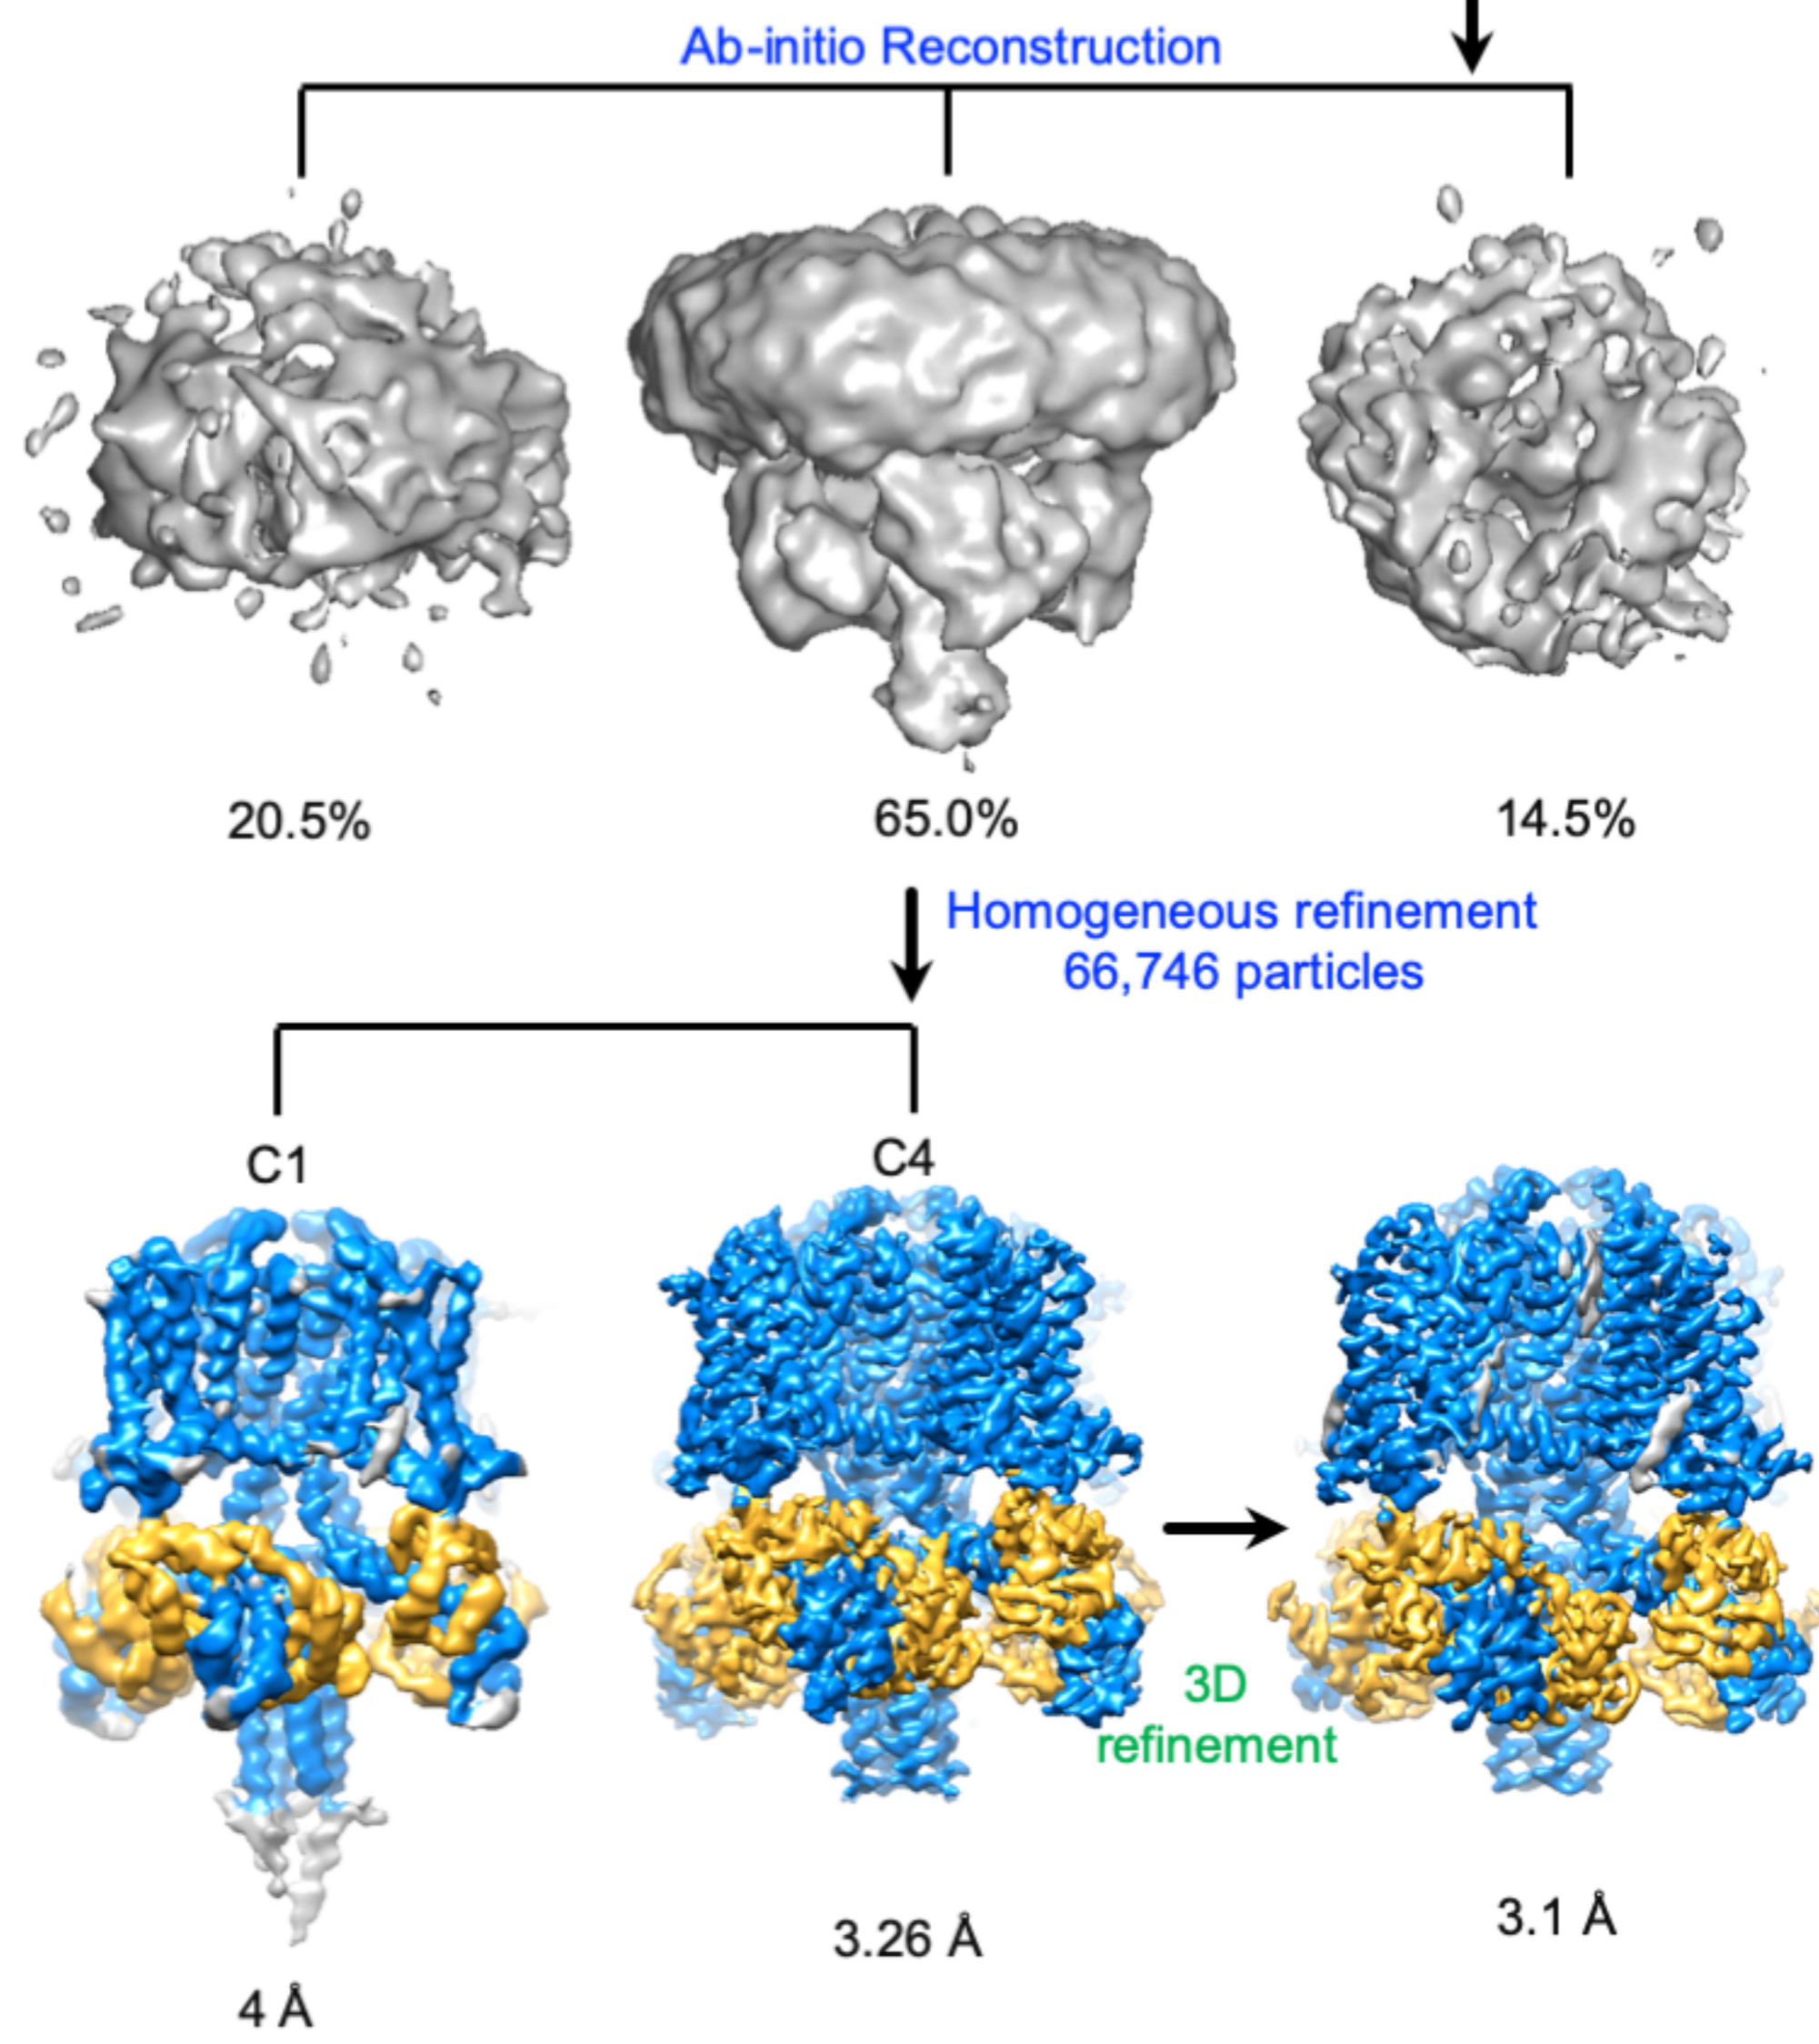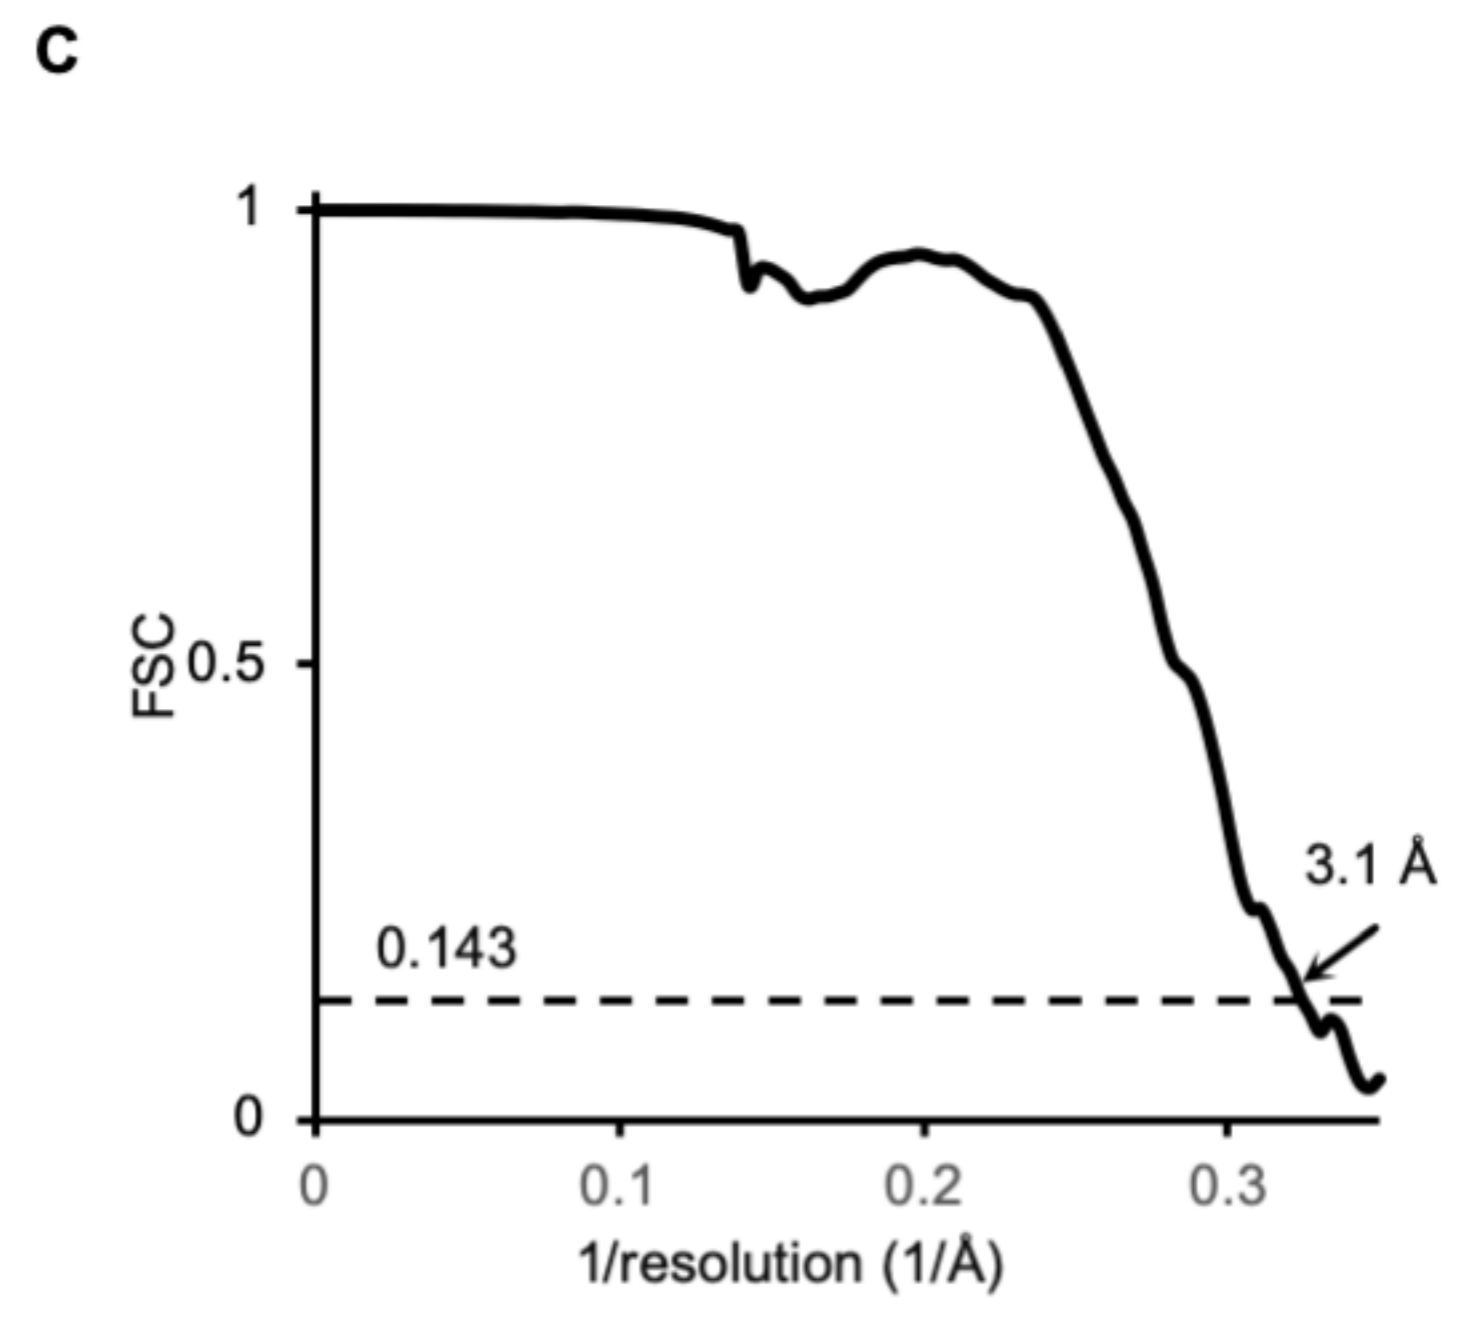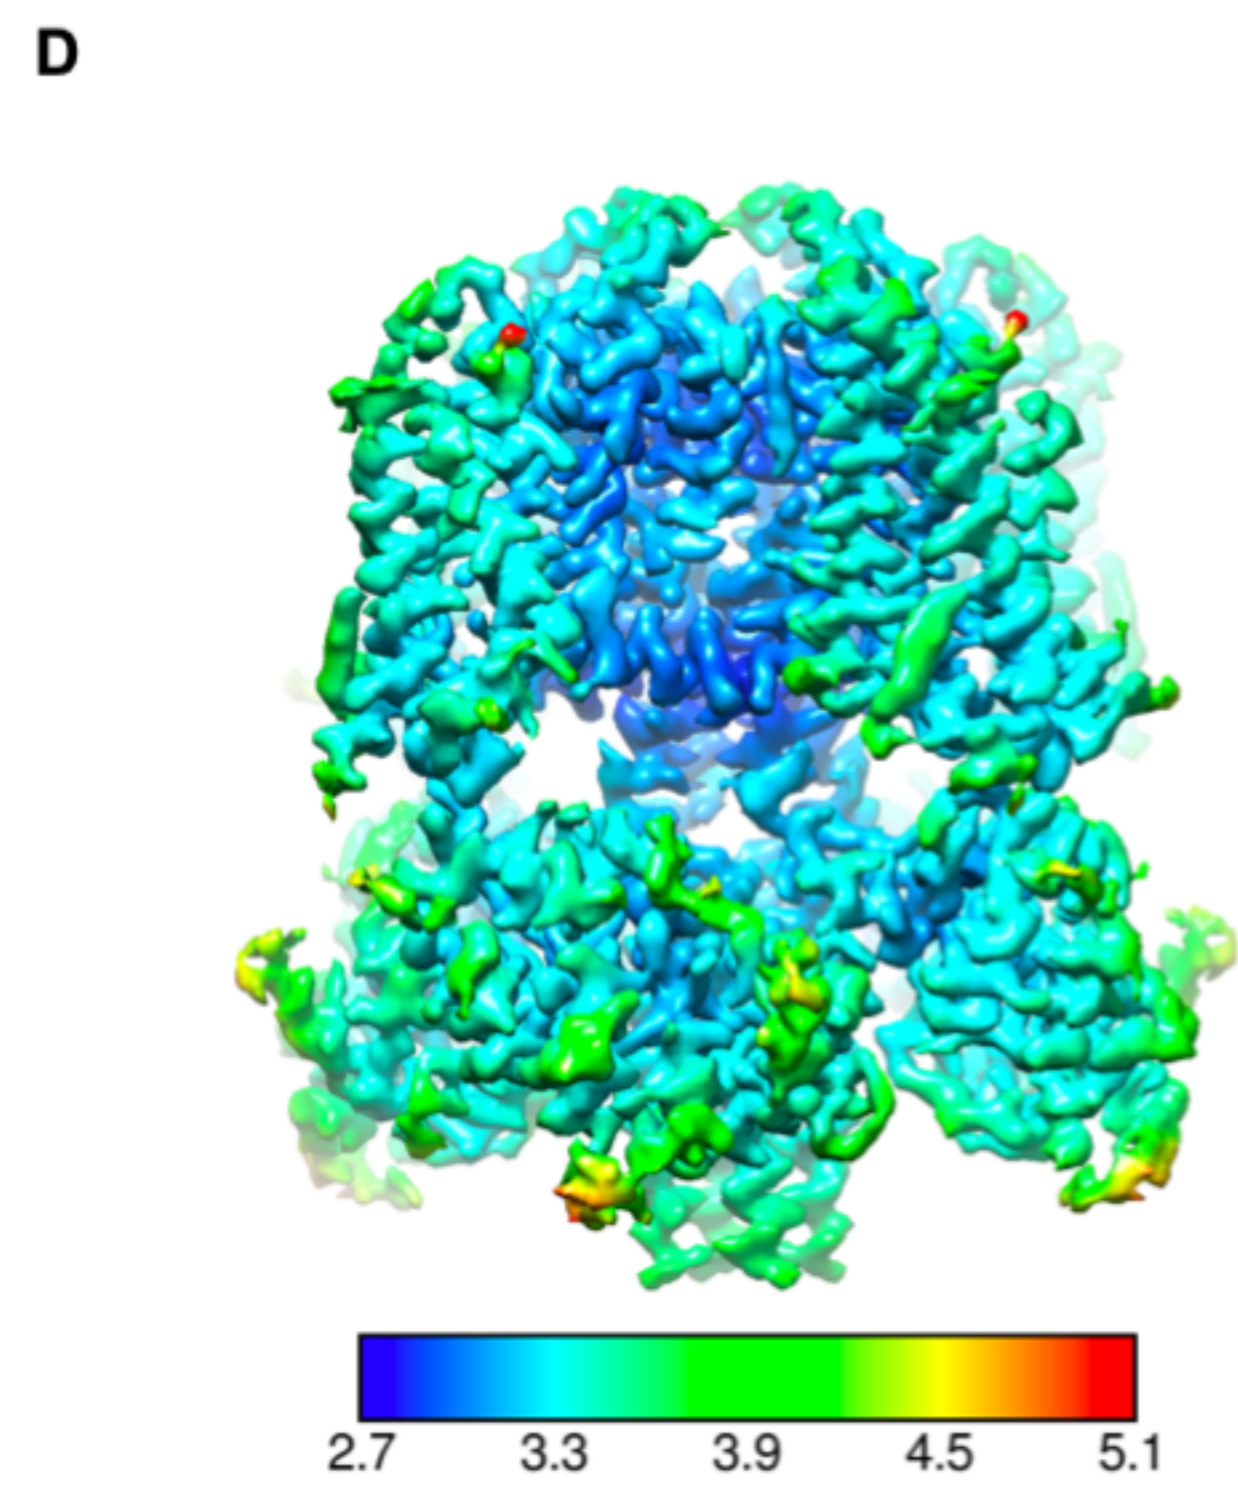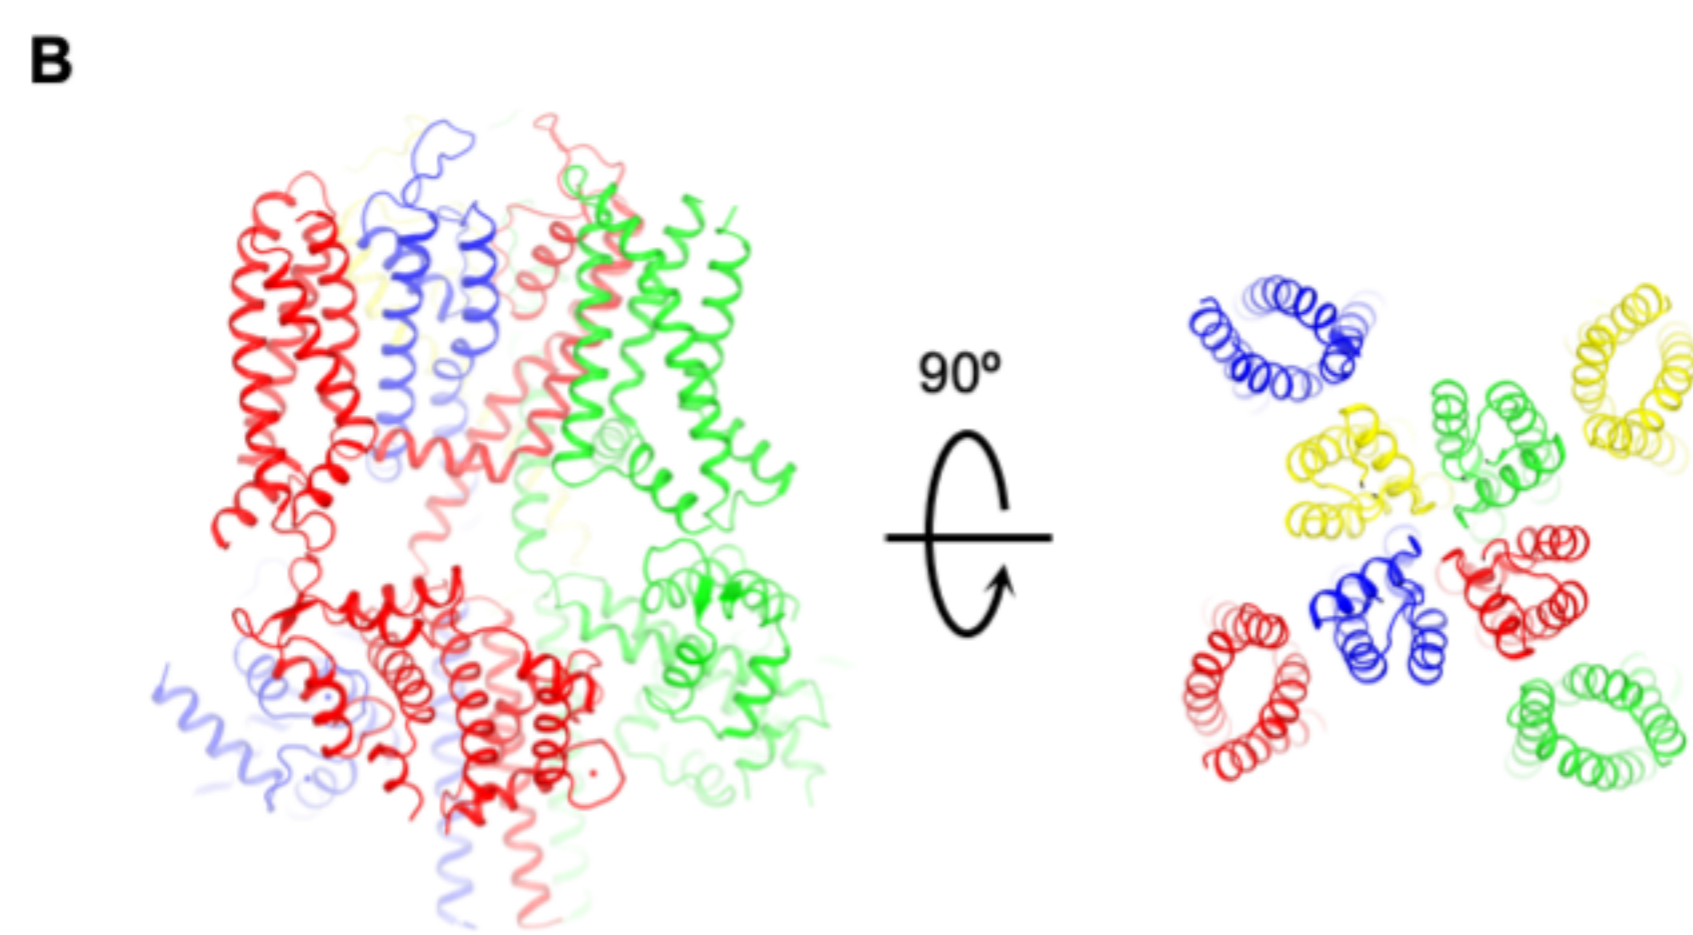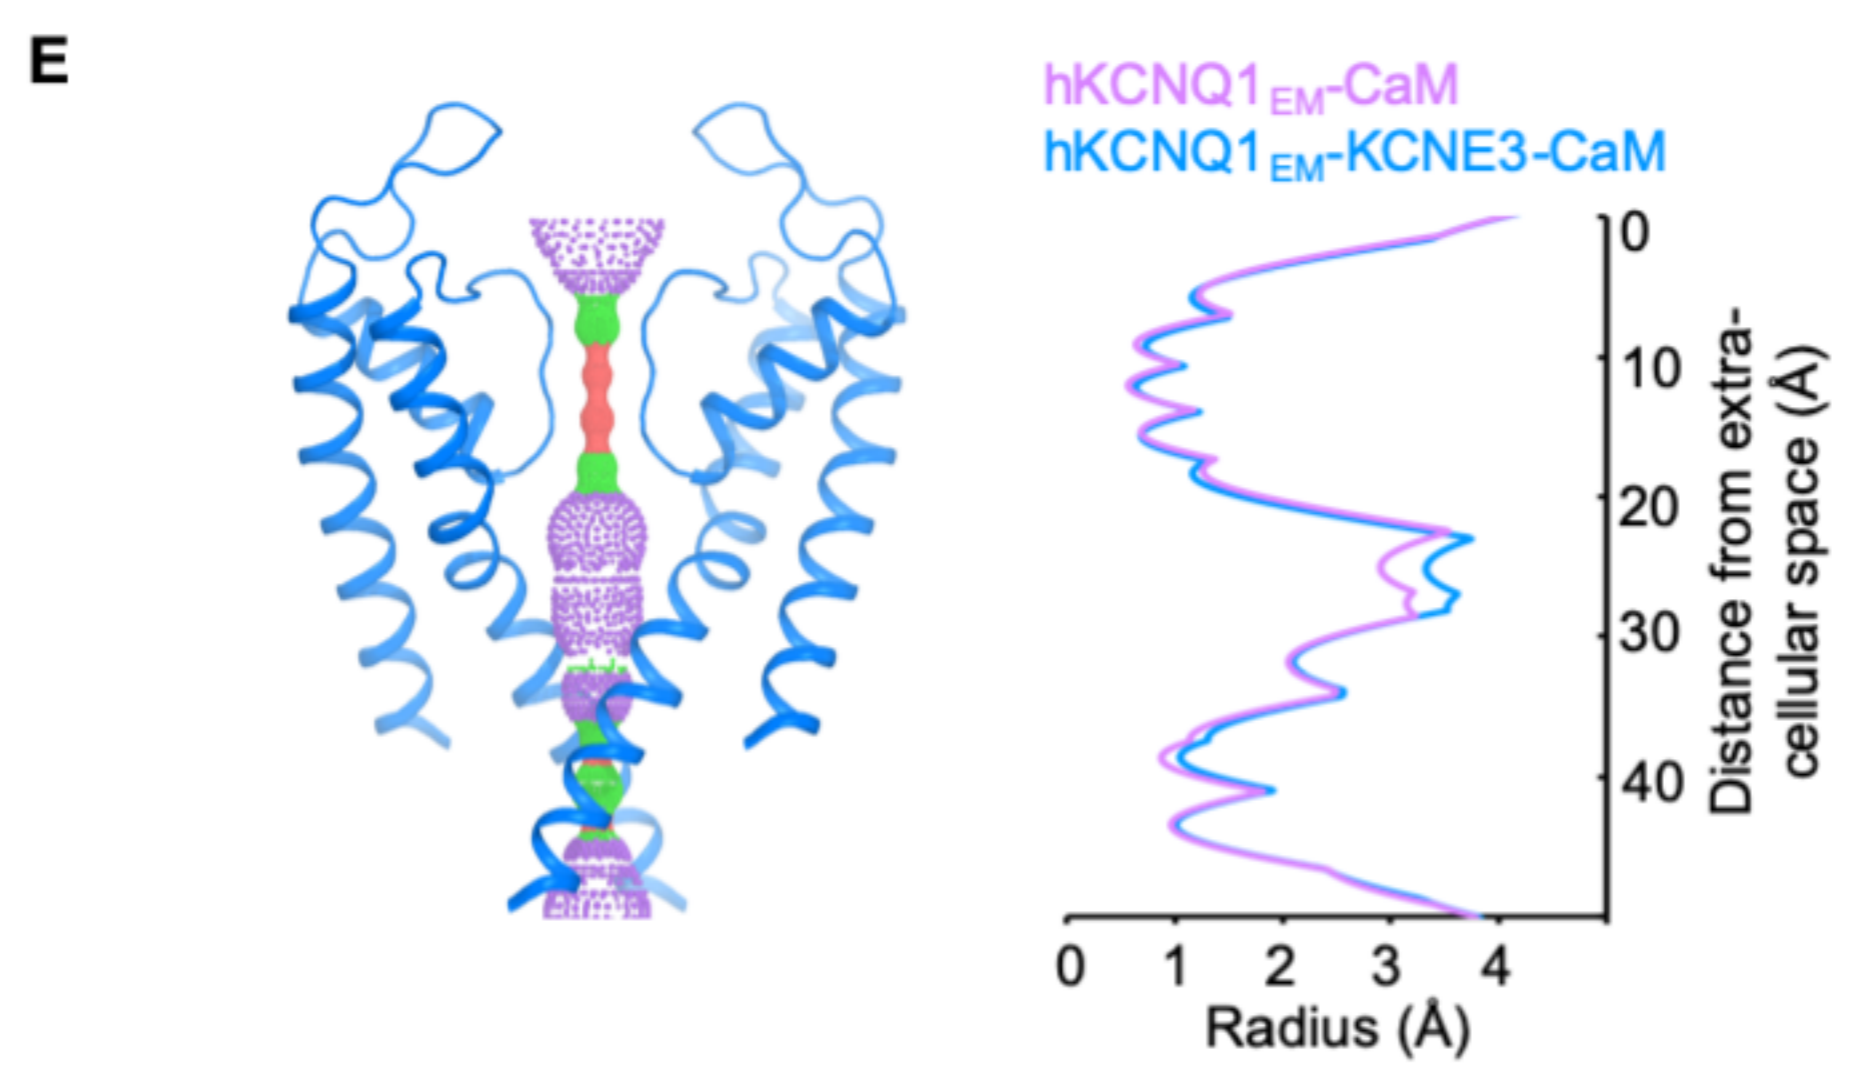

Supplement: NIHMS1569521-supplement-3.pdf [file NIHMS1569521-supplement-3.pdf]

**A**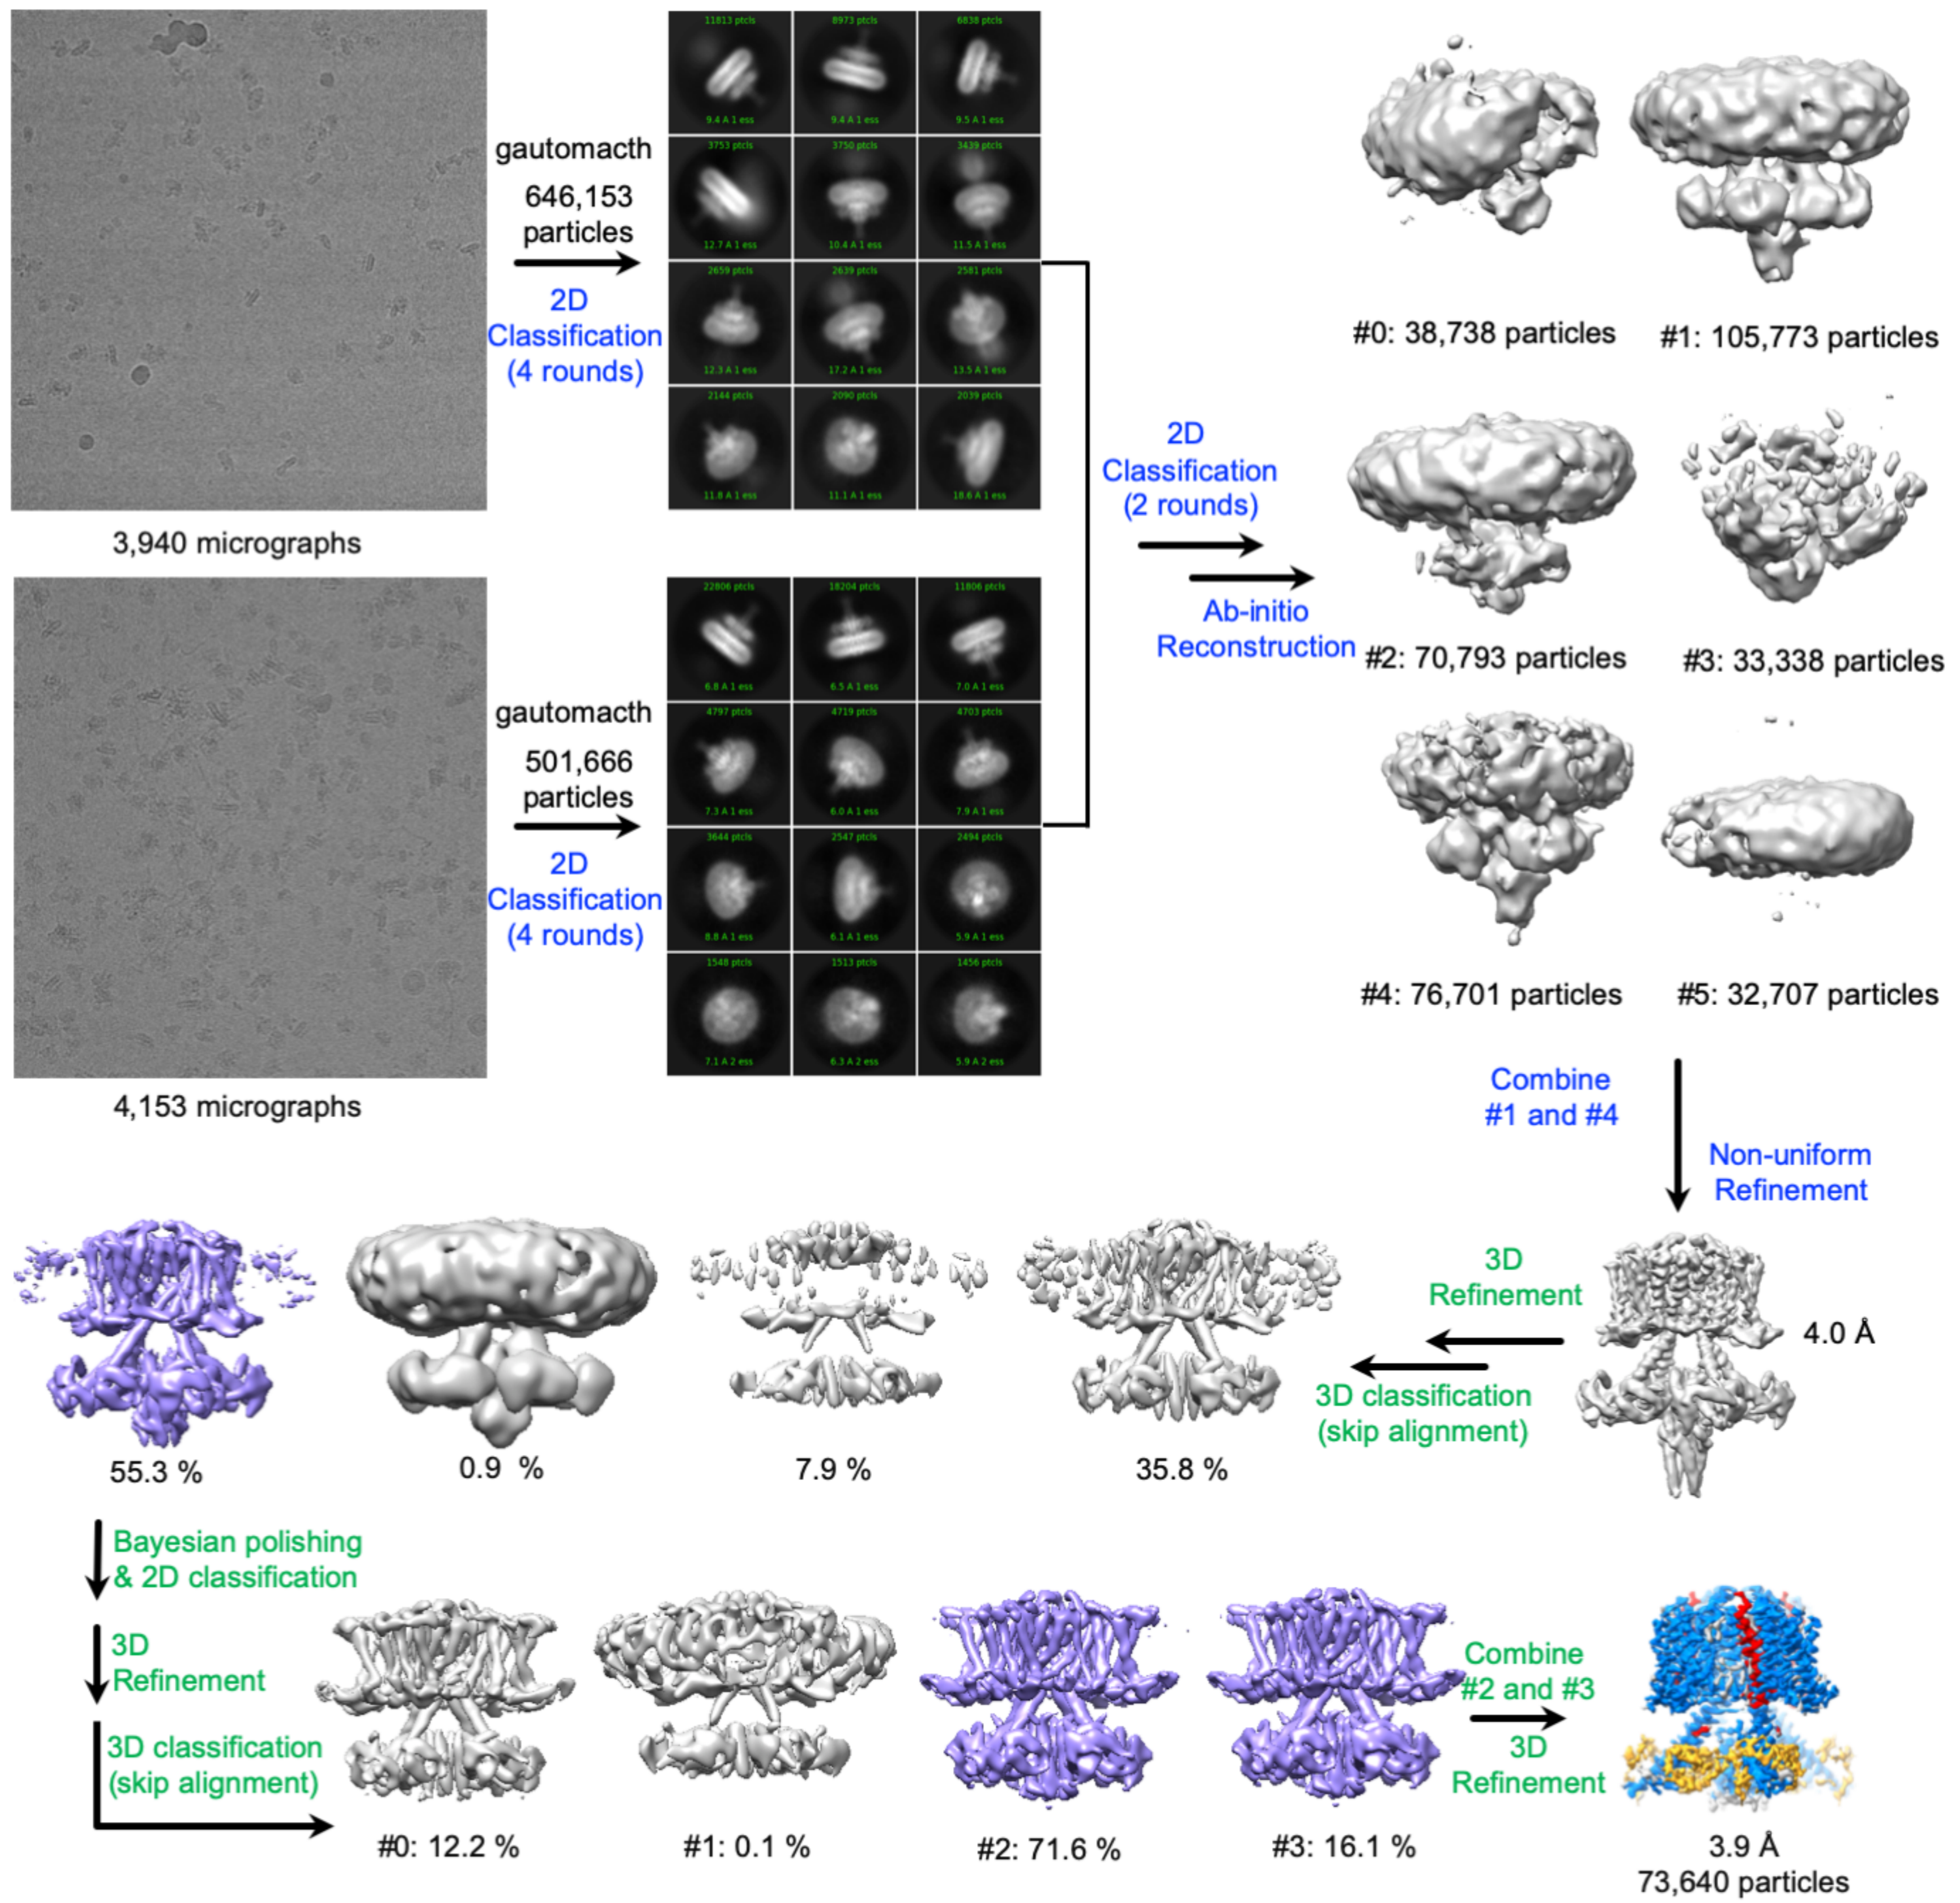**B**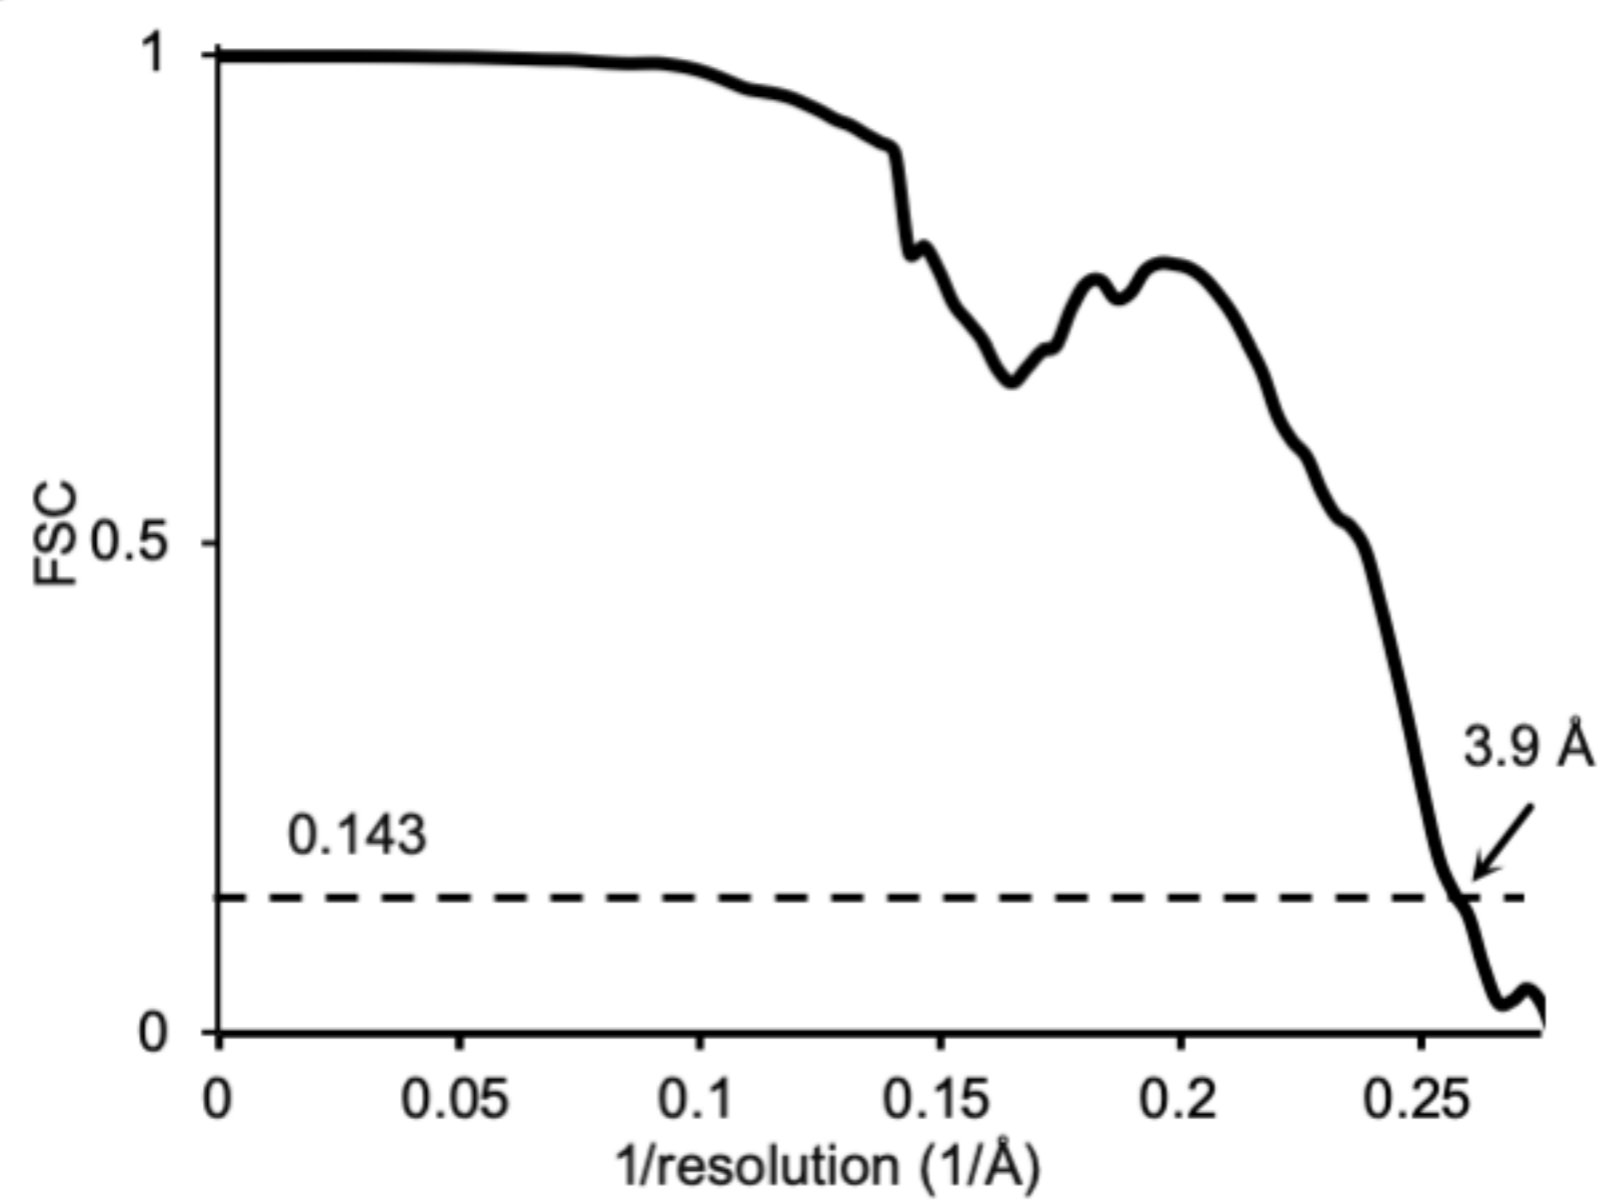**C**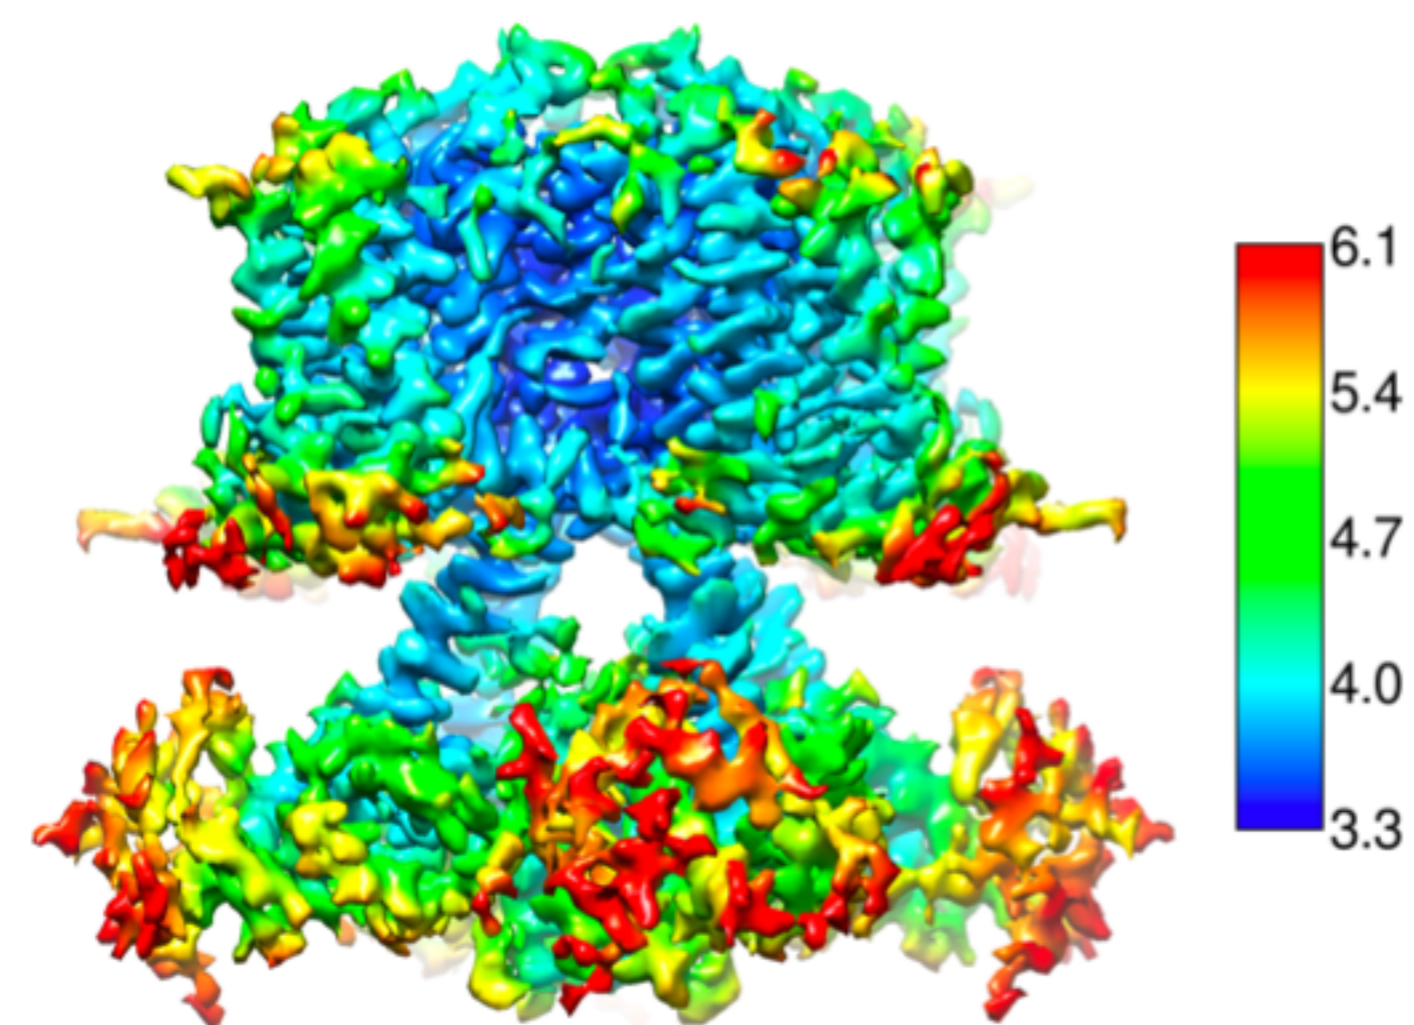

Supplement: NIHMS1569521-supplement-4.pdf [file NIHMS1569521-supplement-4.pdf]
